# Supplementary material for: Selective perfluoroalkylation and defluorination functionalization of indoles
Source: Royal Society of Chemistry journal article supplement (doi:10.1039/d5qo00024f), 2025-01-01

## Selective perfluoroalkylation and defluorinative functionalization of Indoles

Meina Li, Guizhao Wang and Faqiang Leng\*

School of Pharmaceutical Sciences, Capital Medical University, Beijing 100069, P. R. China.

Email: fqleng@ccmu.edu.cn

### Table of content

|                                                                                |    |
|--------------------------------------------------------------------------------|----|
| General information .....                                                      | 2  |
| General procedure .....                                                        | 2  |
| Optimization of reaction condition for hydrofluoroalkylated indoles 3a .....   | 3  |
| Optimization of reaction condition for hydroxyfluoroalkylated indoles 4a ..... | 5  |
| In-situ GC-MS analysis .....                                                   | 6  |
| In-situ <sup>19</sup> F NMR analysis .....                                     | 8  |
| Unsatisfactory examples of hydrodefluorination .....                           | 8  |
| Characterization data of Compounds .....                                       | 10 |
| Copies of NMR spectra .....                                                    | 20 |

## General information

Unless otherwise mentioned, solvents and reagents were purchased from commercial sources and used as received. All manipulations were carried out in glass reaction tube equipped with a magnetic stir bar.  $^1\text{H}$  NMR,  $^{19}\text{F}$ -NMR and  $^{13}\text{C}$  NMR spectra were recorded on a Bruker AM500/300 spectrometer using  $\text{d}^6$ -DMSO or  $\text{CDCl}_3$  as solvent, TMS as internal standard substance. Chemical shifts ( $\delta$ ) are reported in ppm, and coupling constants (J) are in Hertz (Hz). The following abbreviations were used to explain the multiplicities: s = singlet, d = doublet, t = triplet, q = quartet, m = multiplet. The Mass spectrum was received via Agilent (7000C) GC-MS/Waters (Quattro Micro) and LC-MS/MS X500R QTOF (AB SCIEX)

## General procedure

### Synthesis of hydrofluoroalkylated/ hydroxyfluoroalkylated indoles

Indoles (39.3 mg, 0.3 mmol, 1.0 equiv.) **1a**,  $\text{Na}_2\text{S}_2\text{O}_4$ /additives (52-469 mg, 0.3-2.7 mmol, 1.0-9.0 equiv.), and 2 mL solvent were added to a Schlenk sealed tube, following perfluoroalkyl iodide **2** (0.3-0.9 mmol, 1.0-3.0 equiv.) was added to the mixture solution. After addition, the mixture was allowed for string 4-12h under set temperature (heated in a heating module). Then, 10ml  $\text{NaHCO}_3$  (Saturated aq.) was added, and the reaction mixture was extracted by ethyl acetate 3 times. The organic layer was combined, washed with brine for once, and dried over  $\text{Na}_2\text{SO}_4$ . The solvent was removed by reduced pressure rotary evaporation and purified by column chromatography on silica gel with petroleum ether/ethyl acetate (PE/EA 20/1-5/1) to give **3/4**.

## Optimization of reaction condition for hydrofluoroalkylated indoles **3a**

**S-Table 2** Solvent effect<sup>a</sup>

| Entry | Solvent Ratio (v/v)                     | Yield (%) |
|-------|-----------------------------------------|-----------|
| 1     | CH <sub>3</sub> CN/H <sub>2</sub> O 4:1 | 51.0      |
| 2     | CH <sub>3</sub> CN/H <sub>2</sub> O 2:1 | 63.8      |
| 3     | CH <sub>3</sub> CN/H <sub>2</sub> O 1:1 | 73.7      |
| 4     | CH <sub>3</sub> CN/H <sub>2</sub> O 1:2 | 72.8      |
| 5     | CH <sub>3</sub> CN/H <sub>2</sub> O 1:4 | 55.5      |

<sup>a</sup>Reaction conditions: **1a** (39.3 mg, 0.3 mmol, 1.0 equiv.), **2a** C<sub>3</sub>F<sub>7</sub>I (265.5 mg, 0.9 mmol, 3.0 equiv.), Na<sub>2</sub>S<sub>2</sub>O<sub>4</sub> (0.9 mmol 3.0 eq), solvent (2.0 mL), 100 °C, 4 h, <sup>19</sup>F NMR yields using PhCF<sub>3</sub> as an internal standard.

**S-Table 3** Additives effect<sup>a</sup>

| Entry | Additives                                               | Yield (%) |
|-------|---------------------------------------------------------|-----------|
| 1     | Na <sub>2</sub> S <sub>2</sub> O <sub>4</sub>           | 73.7      |
| 2     | Thiourea Dioxide                                        | 27.6      |
| 3     | Na <sub>2</sub> S <sub>2</sub> O <sub>5</sub>           | 50.9      |
| 4     | Na <sub>2</sub> S <sub>2</sub> O <sub>3</sub>           | N.D.      |
| 5     | Rongalite                                               | N.D.      |
| 6     | Na <sub>2</sub> S <sub>2</sub> O <sub>4</sub> (1.0 eq.) | 43.0      |
| 7     | Na <sub>2</sub> S <sub>2</sub> O <sub>4</sub> (1.5 eq.) | 64.1      |
| 8     | Na <sub>2</sub> S <sub>2</sub> O <sub>4</sub> (2.0 eq.) | 61.7      |
| 9     | Na <sub>2</sub> S <sub>2</sub> O <sub>4</sub> (3.0 eq.) | 73.7      |
| 10    | Na <sub>2</sub> S <sub>2</sub> O <sub>4</sub> (4.0 eq.) | 63.8      |
| 11    | Na <sub>2</sub> S <sub>2</sub> O <sub>4</sub> (5.0 eq.) | 56.5      |

<sup>a</sup>Reaction conditions: **1a** (39.3 mg, 0.3 mmol, 1.0 equiv.), **2a** C<sub>3</sub>F<sub>7</sub>I (265.5 mg, 0.9 mmol, 3.0 equiv.), additives, CH<sub>3</sub>CN/H<sub>2</sub>O(1/1) (2.0 mL), 100 °C, 4 h, <sup>19</sup>F NMR yields using PhCF<sub>3</sub> as an internal standard.

**S-Table 4** Reaction ratio<sup>a</sup>

| Entry | <b>1</b> (eq.) | <b>2</b> (eq.) | Na <sub>2</sub> S <sub>2</sub> O <sub>4</sub> (eq.) | Yield (%) |
|-------|----------------|----------------|-----------------------------------------------------|-----------|
| 1     | 1              | 3.0            | 1.0                                                 | 43.0      |
| 2     | 1              | 3.0            | 1.5                                                 | 64.1      |
| 3     | 1              | 3.0            | 2.0                                                 | 61.7      |
| 4     | 1              | 3.0            | 3.0                                                 | 73.7      |
| 5     | 1              | 3.0            | 4.0                                                 | 63.8      |
| 6     | 1              | 3.0            | 5.0                                                 | 56.5      |

<sup>a</sup>Reaction conditions: **1a**, **2a** C<sub>3</sub>F<sub>7</sub>I, Na<sub>2</sub>S<sub>2</sub>O<sub>4</sub>, CH<sub>3</sub>CN/H<sub>2</sub>O(1/1) solvent (2.0 mL), 100 °C, 4 h, <sup>19</sup>F NMR yields using PhCF<sub>3</sub> as an internal standard.

**S-Table 5** Reaction ratio<sup>a</sup>

| Entry | <b>1</b> (mmol) | <b>2</b> (mmol) | Na <sub>2</sub> S <sub>2</sub> O <sub>4</sub> (mmol) | Yield (%) |
|-------|-----------------|-----------------|------------------------------------------------------|-----------|
| 1     | 1               | 1.0             | 3.0                                                  | 36.7      |
| 2     | 1               | 2.0             | 3.0                                                  | 62.5      |
| 3     | 1               | 3.0             | 3.0                                                  | 75        |
| 4     | 1               | 4.0             | 3.0                                                  | 75.5      |
| 5     | 1               | 5.0             | 3.0                                                  | 75.6      |

<sup>a</sup>Reaction conditions: **1a**, **2a** C<sub>3</sub>F<sub>7</sub>I, Na<sub>2</sub>S<sub>2</sub>O<sub>4</sub>, CH<sub>3</sub>CN/H<sub>2</sub>O(1/1) solvent (2.0 mL), 100 °C, 4 h, <sup>19</sup>F NMR yields using PhCF<sub>3</sub> as an internal standard.

**S-Table 6** Temperature effect<sup>a</sup>

| Entry | Temperature (°C) | Yield (%) |
|-------|------------------|-----------|
| 1     | 80               | N.D.      |
| 2     | 100              | 73.7      |
| 3     | 110              | 73.9      |
| 4     | 120              | 70        |
| 5     | 130              | 71        |

<sup>a</sup>Reaction conditions: **1a** (39.3 mg, 0.3 mmol, 1.0 equiv.), **2a** C<sub>3</sub>F<sub>7</sub>I (265.5 mg, 0.9 mmol, 3.0 equiv.), Na<sub>2</sub>S<sub>2</sub>O<sub>4</sub> (2.7 mmol equiv.), CH<sub>3</sub>CN/H<sub>2</sub>O(1/1) (2.0 mL), 4 h, <sup>19</sup>F NMR yields using PhCF<sub>3</sub> as an internal standard.

**S-Table 7** Reaction time<sup>a</sup>

| Entry | Time(h) | Yield (%) |
|-------|---------|-----------|
| 1     | 1       | 41        |
| 2     | 2       | 57        |
| 3     | 3       | 72        |
| 4     | 4       | 74        |
| 5     | 5       | 73        |

<sup>a</sup>Reaction conditions: **1a** (39.3 mg, 0.3 mmol, 1.0 equiv.), **2a** C<sub>3</sub>F<sub>7</sub>I (265.5 mg, 0.9 mmol, 3.0 equiv.), Na<sub>2</sub>S<sub>2</sub>O<sub>4</sub> (2.7 mmol, 9 equiv.), CH<sub>3</sub>CN/H<sub>2</sub>O(1/1) (2.0 mL), 100 °C, <sup>19</sup>F NMR yields using PhCF<sub>3</sub> as an internal standard.

### Optimization of reaction condition for hydroxyfluoroalkylated indoles **4a**

**S-Table 1** Solvent effect<sup>a</sup>

| Entry | Sovent                                           | Yield (%) |
|-------|--------------------------------------------------|-----------|
| 1     | CH <sub>3</sub> CN                               | trace     |
| 2     | H <sub>2</sub> O                                 | trace     |
| 4     | DMSO                                             | trace     |
| 5     | THF                                              | trace     |
| 6     | DMF                                              | trace     |
| 7     | DMSO/CH <sub>3</sub> CN/H <sub>2</sub> O 0.5:2:1 | 23        |
| 8     | DMSO/CH <sub>3</sub> CN/H <sub>2</sub> O 1:2:1   | 31        |
| 9     | DMSO/CH <sub>3</sub> CN/H <sub>2</sub> O 2:2:1   | 42        |
| 9     | DMSO/CH <sub>3</sub> CN/H <sub>2</sub> O 4:2:1   | 36        |
| 10    | DMSO/CH <sub>3</sub> CN/H <sub>2</sub> O 1:5:1   | 40        |

<sup>a</sup>Reaction conditions: **1a** (39.3 mg, 0.3 mmol, 1.0 equiv.), **2a** C<sub>3</sub>F<sub>7</sub>I (265.5 mg, 0.9 mmol, 3.0 equiv.), Na<sub>2</sub>S<sub>2</sub>O<sub>4</sub> (0.9 mmol 3.0 eq), solvent (2.0 mL), 100 °C, 4 h, <sup>19</sup>F NMR yields using PhCF<sub>3</sub> as an internal standard.

## *In-situ* GC-MS analysis

### Investigating the Impact of Reaction Solvents on Selectivity: Steps

2-Methyl-1H-indole (39.3 mg, 0.3 mmol, 1.0 equiv.), Na<sub>2</sub>S<sub>2</sub>O<sub>4</sub> (156.6 mg, 0.9 mmol, 3.0 equiv.), and 2 mL of mixed solvent were added to a sealed Schlenk tube. Subsequently, C<sub>3</sub>F<sub>7</sub>I 2a (0.9 mmol, 3.0 equiv.) was added to the mixture, and the resulting mixture was stirred for 10 minutes. After the addition, the mixture was heated and stirred at 100 °C (in a heating module). After filtration, the reaction mixture was analyzed by GC-MS.

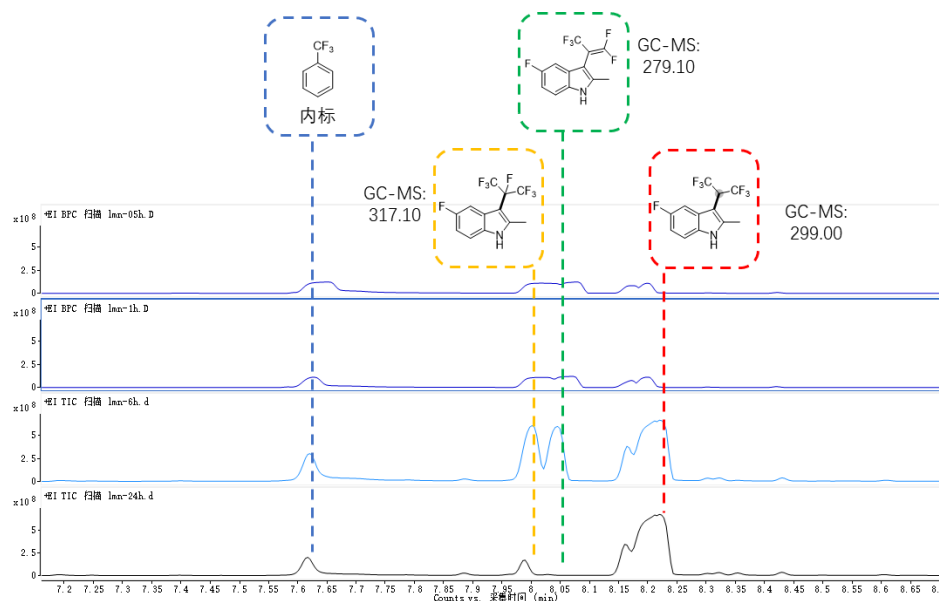

**S-Figure 1a.** The effect of mixed solvents on reaction selectivity analyzed via GC-MS

### *In-Situ* GC-MS Analysis of 3g in a CH<sub>3</sub>CN/H<sub>2</sub>O (1:1) Mixture: Step-by-Step Procedure

Additionally, the experiment was monitored in situ using GC-MS. 2-methyl-1H-indole (39.3 mg, 0.3 mmol, 1.0 equiv.), Na<sub>2</sub>S<sub>2</sub>O<sub>4</sub> (156.6 mg, 0.9 mmol, 3.0 equiv.), and 2 mL of a CH<sub>3</sub>CN/H<sub>2</sub>O (1/1) mixed solvent were added to a sealed Schlenk tube. Then, C<sub>3</sub>F<sub>7</sub>I 2a (0.9 mmol, 3.0 equiv.) was added to the mixture, which was subsequently heated and stirred at 100 °C (in a heating module). Samples of 200 μL of the reaction solution were taken for analysis at 0.5 hours, 1 hour, 2 hours, and 3 hours, respectively.

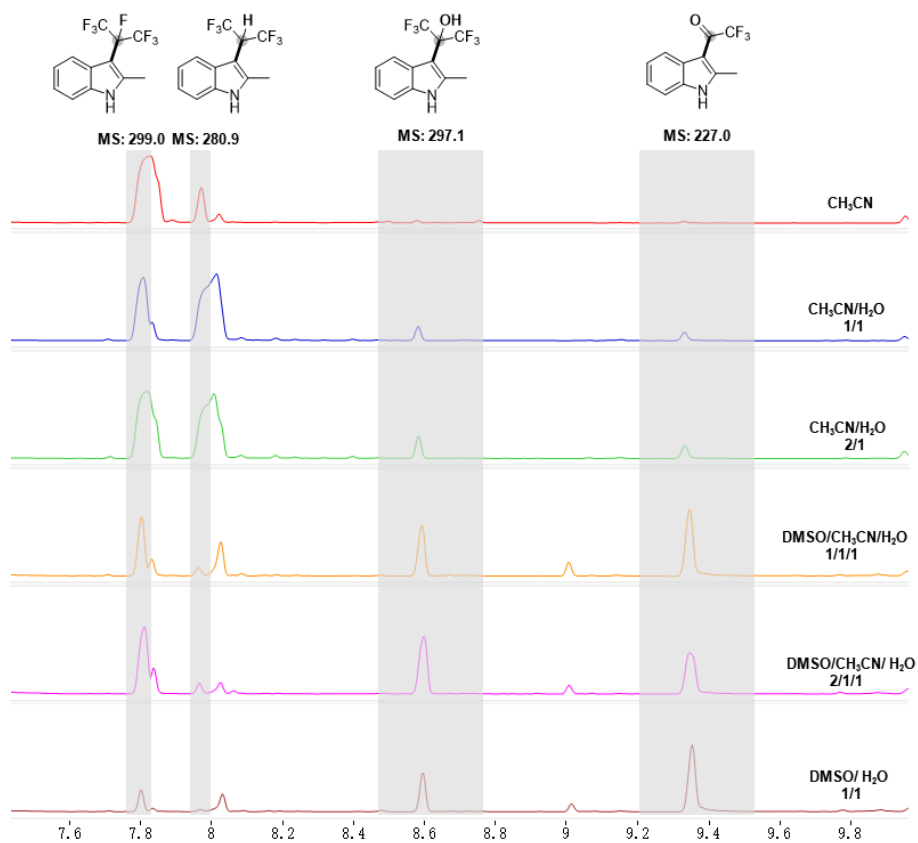

**S-Figure 1b. In-situ GC-MS analysis of 3g in CH<sub>3</sub>CN/H<sub>2</sub>O 1/1**

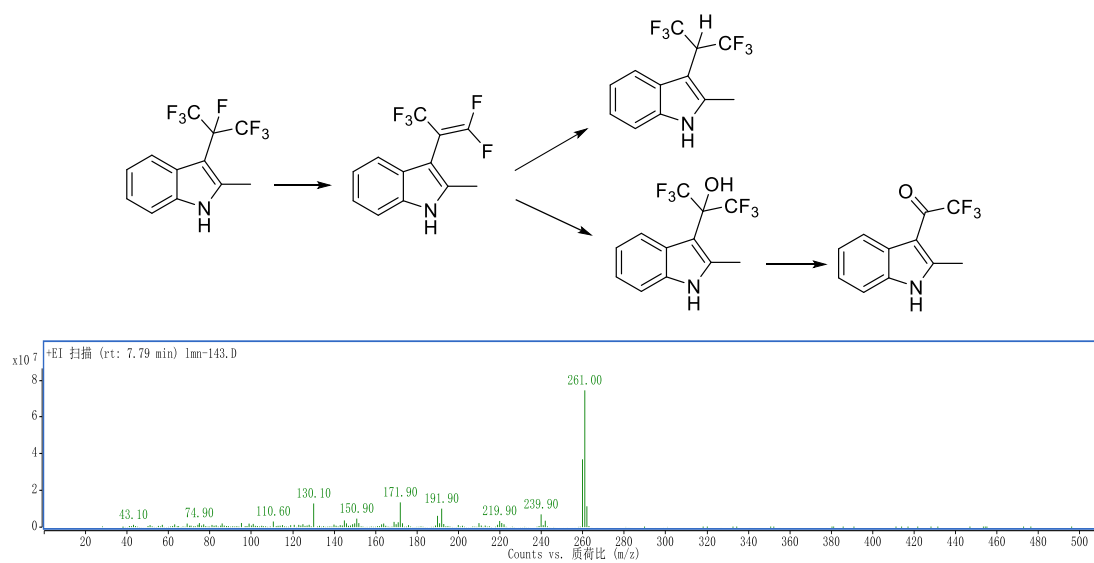

**S-Figure 1c. GC-MS of control experiments**

## *In-situ* $^{19}\text{F}$ NMR analysis

To understand the fluoroacylation reaction further, the experiment was conducted and monitored by the in-situ  $^{19}\text{F}$  NMR. 2-methyl-1H-indole (39.3 mg, 0.3 mmol, 1.0 equiv.),  $\text{Na}_2\text{S}_2\text{O}_4$  (156.6 mg, 0.9 mmol, 3.0 equiv.), and 2 mL DMSO/ $\text{CH}_3\text{CN}/\text{H}_2\text{O}$  (1/2/1) solvent were added to a Schlenk sealed tube, following  $\text{C}_4\text{F}_9\text{I}$  2a (311.3 mg, 0.9 mmol, 3.0 equiv.) was added to the mixture solution and then the resulting mixture was a string for 10 min. After addition, the mixture was allowed for string under  $100\text{ }^\circ\text{C}$  (heated in a heating module). Then, 200  $\mu\text{L}$  of the reaction solution was taken at 0.5 h, 1 h, 2 h, 3 h, respectively, and then deuterated solvent DMSO (400  $\mu\text{L}$ ) was added, and the reaction mixture was checked by  $^{19}\text{F}$ -NMR after filtration. After 0.5 h of the start of the reaction, we found two peaks at chemical shifts of -79 and -80 ppm that should be attributed to the perfluoroalkylation and acylation products, respectively. As from 0.5 h to 3 h, the signal at -79 ppm start-ed to fade gradually, while the signal at -80 ppm gradually increased.

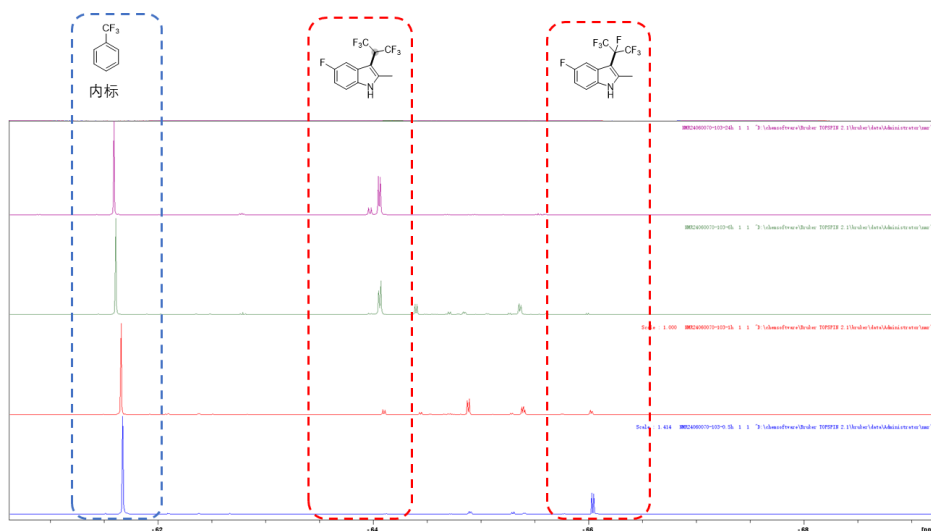

S-Figure 2.  $^{19}\text{F}$ -NMR of control experiments 3a

## Unsatisfactory examples of hydrodefluorination

The scope of unsatisfactory substrates was summarized as following:



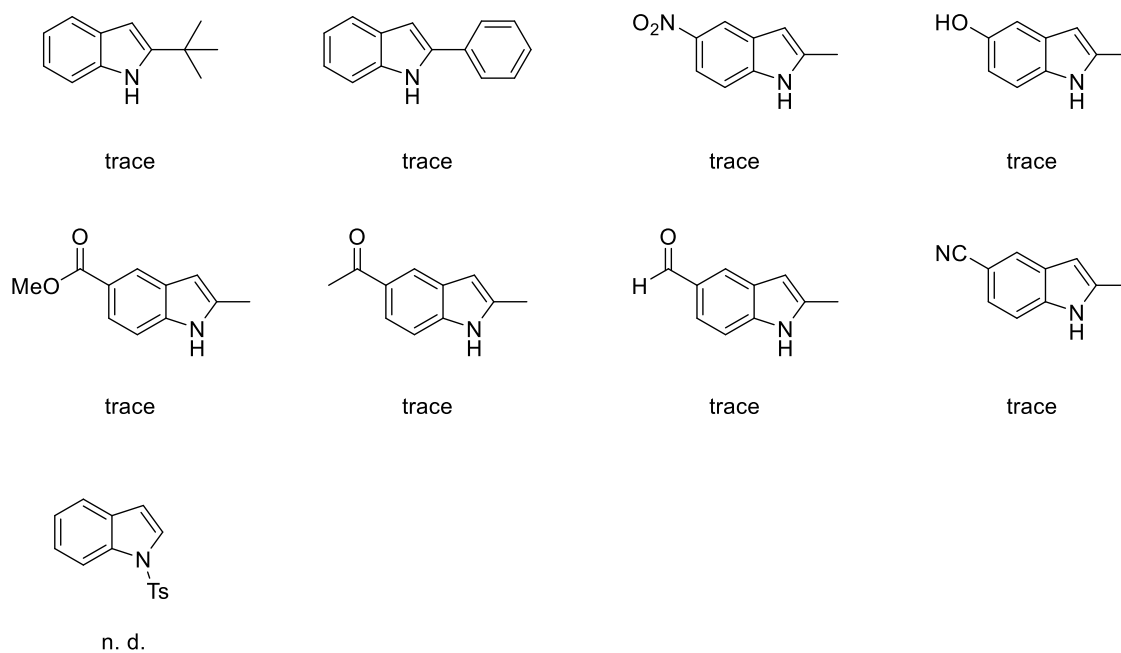

**S-Figure 3. the scope of hydrofluoroalkylation indoles with C<sub>3</sub>F<sub>7</sub>I**

“Trace” means that the conversion of starting material is low, no products or only unidentified mixture were obtained; “n. d.” means not detected

## Characterization data of Compounds

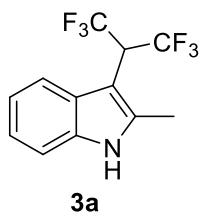

**3-(1,1,1,3,3,3-hexafluoropropan-2-yl)-2-methyl-1H-indole 3a**, brown solid (74 % yield).  $^1\text{H-NMR}$  **3a** (300 MHz, DMSO- $d_6$ , ppm)  $\delta$  = 11.44 (s, 1H), 7.47 (d,  $J$  = 7.93 Hz, 1H), 7.34 (d,  $J$  = 7.78 Hz, 1H), 7.11-6.90 (m, 2H), 5.33 (sept,  $J$  = 9.58 Hz, 1H), 2.46 (s, 3H);  $^{13}\text{C-NMR}$  (75 MHz, DMSO- $d_6$ , ppm)  $\delta$  = 138.98 (s), 136.02 (s), 126.07 (s), 124.66 (q,  $J$  = 280.19 Hz, 2C), 121.29 (s), 120.04 (s), 119.24 (s), 111.52 (s), 95.91 (s), 45.78 (t,  $J$  = 29.78 Hz, 1C), 11.54 (s);  $^{19}\text{F-NMR}$  (475 MHz, DMSO- $d_6$ , ppm)  $\delta$  = -63.63 (d,  $J$  = 9.56 Hz, 6F); **HRMS(ESI)**  $m/z$   $[\text{M}+\text{H}]^+$ : Calcd. for  $\text{C}_{12}\text{H}_9\text{F}_6\text{N}$  282.0717, found 282.0708.

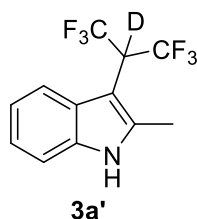

**3-(1,1,1,3,3,3-hexafluoropropan-2-yl-2-d)-2-methyl-1H-indole 3a'**, brown solid (67 % yield).  $^1\text{H-NMR}$  **3a'** (500 MHz, DMSO- $d_6$ , ppm)  $\delta$  = 11.45 (s, 1H), 7.48 (d,  $J$  = 7.40 Hz, 1H), 7.34 (d,  $J$  = 7.95 Hz, 1H), 7.13-7.09 (m, 2H), 2.47 (s, 3H);  $^{13}\text{C-NMR}$  (125 MHz, DMSO- $d_6$ , ppm)  $\delta$  = 139.00 (s), 136.02 (s), 126.07 (s), 124.66 (q,  $J$  = 280.00 Hz, 2C), 121.29 (s), 120.06 (s), 119.26 (s), 111.54 (s), 95.90 (s), 45.70 (t,  $J$  = 29.78 Hz, 1C), 11.54 (s);  $^{19}\text{F-NMR}$  (475 MHz, DMSO- $d_6$ , ppm)  $\delta$  = -63.73 (s, 6F); **HRMS(EI)**  $m/z$   $[\text{M}]^+$ : Calcd. for  $\text{C}_{12}\text{H}_8\text{DF}_6\text{N}$  282.0702, found 282.0690.

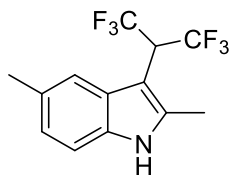

**3b**

**3-(1,1,1,3,3,3-hexafluoropropan-2-yl)-2,5-dimethyl-1H-indole 3b**, brown solid (63 % yield).  $^1\text{H-NMR}$  (300 MHz, Chlorform-d, ppm)  $\delta$  = 7.89 (s,1H), 7.37 (s,1H), 7.10 (d,  $J$  = 8.33 Hz, 1H), 6.93 (d,  $J$  = 8.25 Hz, 1H), 4.15 (sept,  $J$  = 8.92 Hz, 1H), 2.37 (s, 3H), 2.31 (s, 3H);  $^{13}\text{C-NMR}$  (300 MHz, Chlorform-d, ppm)  $\delta$  = 131.5, 128.8, 125.2, 121.5, 119.0, (q,  $J$  = 277.4 Hz), 118..8, 115.1,105.5, 92.5, 42.6(q,  $J$  = 30.5 Hz), 17.0, 6.9;  $^{19}\text{F-NMR}$  (475 MHz, DMSO-d<sup>6</sup>, ppm)  $\delta$  = -63.63 (d,  $J$  = 9.56 Hz, 6F); **HRMS(ESI)**  $m/z$   $[\text{M}+\text{H}]^+$  Calcd. for  $\text{C}_{13}\text{H}_{11}\text{F}_6\text{N}$  296.0874, found 296.0869.

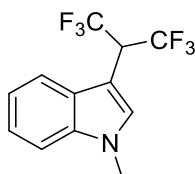

**3c**

**3-(1,1,1,3,3,3-hexafluoropropan-2-yl)-1-methyl-1H-indole 3c**, light brown solid (25 % yield).  $^1\text{H-NMR}$  (300 MHz, DMSO-d<sup>6</sup>, ppm)  $\delta$  = 7.78 (d,  $J$  = 8.01 Hz, 1H), 7.58 (s,1H), 7.50 (d,  $J$  = 8.26 Hz, 1H), 7.19 (dt,  $J_1$  = 31.02 Hz,  $J_2$  = 7.45 Hz, 2H), 5.72 (sept,  $J$  = 9.23 Hz, 1H), 3.84 (s, 3H);  $^{13}\text{C-NMR}$  (300 MHz, DMSO-d<sup>6</sup>, ppm)  $\delta$  = 136.7, 130.7, 127.6, 124.2(q,  $J$  = 278.1 Hz), 122.4, 120.3, 119.1, 110.7, 98.6, 44.6 (sept,  $J$  = 29.2 Hz), 33.1;  $^{19}\text{F-NMR}$  (475 MHz, DMSO-d<sup>6</sup>, ppm)  $\delta$  = -65.46 (d,  $J$  = 8.66 Hz, 6F); **HRMS(ESI)**  $m/z$   $[\text{M} + \text{H}]^+$  Calcd. for  $\text{C}_{12}\text{H}_9\text{F}_6\text{N}$  = 282.0717, found 282.0715.

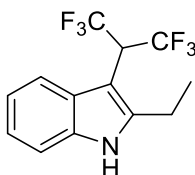

**3d**

**2-ethyl-3-(1,1,1,3,3,3-hexafluoropropan-2-yl)-1H-indole 3d**, brown solid (79 %

yield).; **<sup>1</sup>H-NMR** (300MHz, DMSO-d<sup>6</sup>, ppm)  $\delta$  = 11.37 (s, 1H), 7.42 (d,  $J$  = 7.9 Hz, 1H), 7.35 (d,  $J$  = 7.71 Hz, 1H), 7.05-6.90 (m, 2H), 5.33 (sept,  $J$  = 9.58 Hz, 1H), 2.46 (s, 3H); **<sup>13</sup>C-NMR** (75 MHz, DMSO-d<sup>6</sup>, ppm)  $\delta$  = 144.6, 136.2, 125.9, 124.6 (q,  $J$  = 282.2Hz, ), 121.4, 120.0, 119.6, 111.6, 95.0, 45.7 (q,  $J$  = 29.9 Hz, ), 18.7, 15.0; **<sup>19</sup>F-NMR** (475 MHz, DMSO-d<sup>6</sup>, ppm)  $\delta$  = -63.52 (d,  $J$  = 10.19 Hz, 6F); **HRMS(ESI)**  $m/z$  [M+H]<sup>+</sup> Calcd. for C<sub>13</sub>H<sub>12</sub>F<sub>6</sub>N = 296.0874, found[M+1] 296.0877.

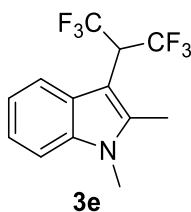

**3-(1,1,1,3,3,3-hexafluoropropan-2-yl)-1,2-dimethyl-1H-indole 3e**, light brown solid (76 % yield). **<sup>1</sup>H-NMR** (300MHz, DMSO-d<sup>6</sup>, ppm)  $\delta$  = 7.54-7.43 (m, 2H), 7.16-7.10 (m, 1H), 7.09-7.00 (m, 1H), 5.42 (sept,  $J$  = 9.6 Hz, 1H), 3.71 (s, 3H), 2.49 (s, 3H); **<sup>13</sup>C-NMR** (300 MHz, DMSO-d<sup>6</sup>, ppm)  $\delta$  = 140.4, 137.1, 125.3, 124.6 (q,  $J$  = 280.8 Hz), 121.4, 120.3, 119.5, 110.2, 95.9, 46.1 (sept,  $J$  = 29.7 Hz), 30.2, 10.3; **<sup>19</sup>F-NMR** (475 MHz, DMSO-d<sup>6</sup>, ppm)  $\delta$  = -63.50 (d,  $J$  = 8.71 Hz, 6F); **HRMS(ESI)**  $m/z$  [M+H]<sup>+</sup> Calcd. for C<sub>13</sub>H<sub>12</sub>F<sub>6</sub>N = 296.0874, found[M+1] 296.0857.

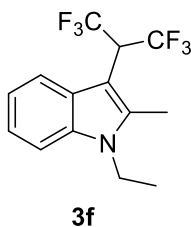

**1-ethyl-3-(1,1,1,3,3,3-hexafluoropropan-2-yl)-2-methyl-1H-indole 3f**, brown solid (93 % yield). **<sup>1</sup>H-NMR** (300MHz, DMSO-d<sup>6</sup>, ppm)  $\delta$  = 7.49 (d,  $J$  = 8.69 Hz, 2H), 7.10 (dt,  $J_1$  = 26.95 Hz,  $J_2$  = 7.85 Hz, 2H), 5.42 (sept,  $J$  = 9.57 Hz, 1H), 4.22 (q,  $J$  = 7.12 Hz, 2H), 2.51 (s, 1H); **<sup>13</sup>C-NMR** (300 MHz, DMSO-d<sup>6</sup>, ppm)  $\delta$  = 139.5, 136.1, 125.5, 123.7 (q,  $J$  = 287.8 Hz), 121.5, 120.3, 119.5, 110.1, 96.0, 46.0

( sept,  $J = 29.9$  Hz), 38.1, 15.3, 9.9;  $^{19}\text{F-NMR}$  (475 MHz,  $\text{DMSO-d}^6$ , ppm)  $\delta = -63.45$  (d,  $J = 10.72$  Hz, 6F); **HRMS(ESI)**  $m/z$   $[\text{M}+\text{H}]^+$  Calcd. for  $\text{C}_{14}\text{H}_{14}\text{F}_6\text{N} = 310.1030$ , found  $[\text{M}+1]$  310.1035.

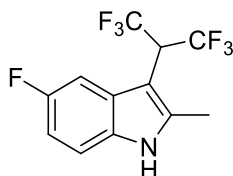

**3g**

**5-fluoro-3-(1,1,1,3,3,3-hexafluoropropan-2-yl)-2-methyl-1H-indole 3g**, brownish-yellow solid (71 % yield).  $^1\text{H-NMR}$  (300 MHz, Chlorform-d, ppm)  $\delta = 8.04$  (s, 1H) ,7.26 (d,  $J = 10.18$  Hz, 1H), 7.19-7.10 (m, 1H), 6.86 (dt,  $J_1 = 2.46$  Hz,  $J_2 = 9.07$  Hz, 1H), 4.16 (sept,  $J = 8.94$  Hz, 1H), 2.37 (s, 3H);  $^{13}\text{C-NMR}$  (300 MHz,  $\text{DMSO-d}^6$ , ppm)  $\delta = 153.7$ (d,  $J = 233.07$  Hz), 133.3, 127.0, 121.7, 118.9 (q,  $J = 277.8$  Hz), 106.3 (d,  $J = 9.8$  Hz), 105.7 (d,  $J = 26.1$  Hz), 100.8 (d,  $J = 23.3$  Hz), 93.4, 42.4 ( sept,  $J = 30.5$  Hz), 7.1;  $^{19}\text{F-NMR}$  (475 MHz,  $\text{DMSO-d}^6$ , ppm)  $\delta = -69.35$  (d,  $J = 8.56$  Hz, 6F), 127.85-127.93 (m, 1F); **HRMS(ESI)**  $m/z$   $[\text{M}+\text{H}]^+$  Calcd. for  $\text{C}_{12}\text{H}_9\text{F}_7\text{N} = 300.0623$ , found 300.0627.

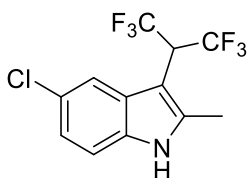

**3h**

**5-chloro-3-(1,1,1,3,3,3-hexafluoropropan-2-yl)-2-methyl-1H-indole 3h** (41 % yield).  $^1\text{H-NMR}$  (300 MHz,  $\text{DMSO-d}^6$ , ppm)  $\delta = 11.7$  (s, 1H) ,7.4-7.3(m, 2H), 7.1 (dd,  $J = 1.92$  Hz  $J = 8.6$  Hz, 1H), 5.41 (sept,  $J = 9.6$  Hz, 1H), 2.48 (s, 3H);  $^{13}\text{C-NMR}$  (300 MHz,  $\text{DMSO-d}^6$ , ppm)  $\delta = 141.1$ , 134.6, 127.1, 124.7, 124.5 (q,  $J = 279.6$  Hz), 121.3, 118.3, 113.1, 95.8, 45.5 (sept,  $J = 29.7$  Hz), 11.6.;  $^{19}\text{F-NMR}$  (475 MHz,  $\text{DMSO-d}^6$ , ppm)  $\delta = -63.73$  (d,  $J = 8.65$  Hz, 6F); **HRMS(ESI)**  $m/z$   $[\text{M}+\text{H}]^+$  Calcd. for  $\text{C}_{12}\text{H}_9\text{ClF}_6\text{N} = 316.0328$ , found 316.0325.

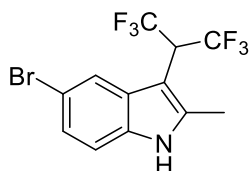

**3i**

**5-bromo-3-(1,1,1,3,3,3-hexafluoropropan-2-yl)-2-methyl-1H-indole 3i**, dark brown solid (38 % yield).  $^1\text{H-NMR}$  (300MHz, DMSO- $d^6$ )  $\delta$  = 11.7 (s, 1H), 7.5(s, 1H), 7.35-7.30 (m, 1H), 7.24-7.17 (m, 1H), 5.4 (sept,  $J$  = 9.5 Hz, 1H), 2.47 (s, 3H);  $^{13}\text{C-NMR}$  (300 MHz, DMSO- $d^6$ , ppm)  $\delta$  = 141.0, 134.8, 127.8, 124.5(q,  $J$  = 279.4 Hz), 123.9, 121.2, 113.6, 112.7, 95.7, 45.5 (sept,  $J$  = 30.3 Hz), 11.6;  $^{19}\text{F-NMR}$  (475 MHz, DMSO- $d^6$ , ppm)  $\delta$  = -63.72 (d,  $J$  = 8.73 Hz, 6F); **HRMS(ESI)**  $m/z$   $[\text{M}+\text{H}]^+$  Calcd. for  $\text{C}_{12}\text{H}_9\text{BrF}_6\text{N}$  = 359.9823, found 359.9819.

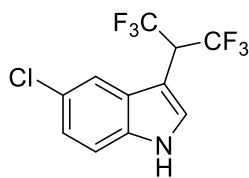

**3j**

**5-chloro-3-(1,1,1,3,3,3-hexafluoropropan-2-yl)-1H-indole 3j**, brown solid (20 % yield).  $^1\text{H-NMR}$  (300 MHz, DMSO- $d^6$ , ppm)  $\delta$  = 11.75 (s, 1H), 7.85 (d,  $J$  = 1.68Hz 1H), 7.62 (d,  $J$  = 2.36 Hz 1H), 7.48 (d,  $J$  = 8.65 Hz, 1H), 7.18 (dd,  $J$  = 1.95 Hz  $J$  = 8.68 Hz, 1H), 5.76 (sept,  $J$  = 9.1Hz, 1H);  $^{13}\text{C-NMR}$  (300MHz, DMSO- $d^6$ , ppm)  $\delta$  = 134.7, 128.5, 128.4, 125.0, 124.2(q,  $J$  = 279.7 Hz), 122.5, 118.2, 114.1, 99.4, 44.5 (sept,  $J$  = 29.4 Hz);  $^{19}\text{F-NMR}$  (475 MHz, DMSO- $d^6$ , ppm)  $\delta$  = -65.58 (d,  $J$  = 8.65 Hz, 6F); **HRMS(ESI)**  $m/z$   $[\text{M}]^+$  Calcd. for  $\text{C}_{11}\text{H}_7\text{ClF}_6\text{N}$  = 301.0093, found  $[\text{M}+1]$  301.0403.

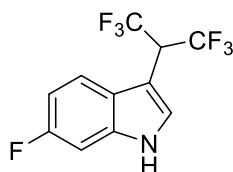

**3k**

**6-fluoro-3-(1,1,1,3,3,3-hexafluoropropan-2-yl)-1H-indole 3k**, brown solid (22 %

yield). **<sup>1</sup>H-NMR** (300MHz, DMSO-d<sup>6</sup>, ppm) δ = 11.60 (s, 1H), 7.75 (dd, *J*<sub>1</sub> = 8.87 Hz, *J*<sub>2</sub> = 5.35 Hz, 1H), 7.55 (d, *J* = 2.57 Hz, 1H), 7.24 (dd, *J*<sub>1</sub> = 9.87 Hz, *J*<sub>2</sub> = 2.39 Hz, 1H), 6.98 (dt, *J*<sub>1</sub> = 2.44 Hz, *J*<sub>2</sub> = 9.34 Hz, 1H), 5.72 (sept, *J* = 9.16 Hz, 1H); **<sup>13</sup>C-NMR** (300 MHz, DMSO-d<sup>6</sup>, ppm) δ = 159.5 (d, *J* = 234.2 Hz), 136.1 (d, *J* = 12.8 Hz), 127.6, 124.2 (q, *J* = 282.5 Hz), 123.9, 120.1 (d, *J* = 10.1 Hz), 108.9 (d, *J* = 24.6 Hz), 99.8, 98.3 (d, *J* = 25.6 Hz), 44.7 (sept, *J* = 29.16 Hz); **<sup>19</sup>F-NMR** (475 MHz, DMSO-d<sup>6</sup>, ppm) δ = -65.46 (d, *J* = 8.67 Hz, 6F); **HRMS(ESI)** m/z [2M+H]<sup>+</sup>Calcd. for C<sub>22</sub>H<sub>13</sub>F<sub>14</sub>N<sub>2</sub> = 571.0855, found[M+1] 571.0871.

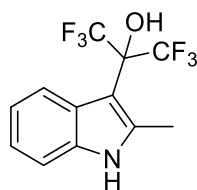

**4a**

**1, 1, 1, 3, 3, 3-hexafluoro-2-(2-methyl-1H-indol-3-yl)propan-2-ol, known compound, (4a<sup>1</sup>)**, light yellow liquid (51 % yield). **<sup>1</sup>H-NMR** (500 MHz, DMSO-d<sup>6</sup>, ppm) δ = 11.42 (s, 1H), 8.17 (s, 1H), 7.66 (d, *J* = 7.94 Hz, 1H), 7.33 (d, *J* = 7.99 Hz, 1H), 7.10-6.96 (m, 2H), 2.54 (s, 3H); **<sup>13</sup>C-NMR** (125 MHz, DMSO-d<sup>6</sup>, ppm) δ = 135.2, 126.8, 124.3 (q, *J* = 287.5 Hz), 121.5 (q, *J* = 126.4 Hz), 121.1, 120.3, 119.9, 111.3, 100.6; **<sup>19</sup>F-NMR** (475 MHz, DMSO-d<sup>6</sup>, ppm) δ = -73.8 (s, 6F). **HRMS(ESI)** m/z: Calcd. for C<sub>12</sub>H<sub>9</sub>F<sub>6</sub>NO = 297.0588, found 297.0586.

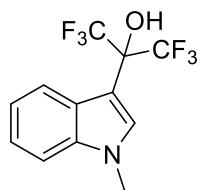

**4b**

**1, 1, 1, 3, 3, 3-hexafluoro-2-(1-methyl-1H-indol-3-yl)propan-2-ol, known compound, (4b<sup>2</sup>)**, light yellow liquid (40 % yield). **<sup>1</sup>H-NMR** (500 MHz, DMSO-d<sup>6</sup>, ppm) δ = 8.39 (s, 1H), 7.82 (d, *J* = 8.23 Hz, 1H), 7.62(m, 1H), 7.50-7.47(s, 1H), 7.51 (d, *J* = 8.23 Hz, 1H), 7.17-7.11 (m, 1H), 3.86 (s, 3H); **<sup>13</sup>C-NMR** (125 MHz, DMSO-d<sup>6</sup>, ppm) δ = 137.2, 130.1, 126.3, 124.0 (t, *J* = 289.8 Hz), 122.3, 121.7, 120.3, 110.7, 103.9, 77.4, 76.2, 33.1; **<sup>19</sup>F-NMR** (475 MHz, DMSO-d<sup>6</sup>, ppm) δ = -74.9 (s, 6F);

**HRMS(ESI) m/z:** Calcd. for C<sub>12</sub>H<sub>9</sub>F<sub>6</sub>NO = 297.0588, found 297.0587.

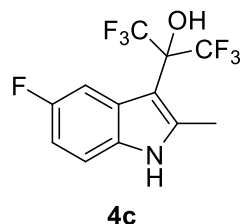

**1,1,1,3,3,3-hexafluoro-2-(5-fluoro-2-methyl-1H-indol-3-yl)propan-2-ol, known compound, 4c<sup>3</sup>,** light brown solid (43 % yield). **<sup>1</sup>H-NMR** (300 MHz, DMSO-d<sup>6</sup>, ppm)  $\delta$  = 11.58 (s, 1H) ,8.29(s, 1H), 7.37-7.25(m, 2H), 6.92 (dt,  $J$  = 2.45 Hz,  $J$  = 9.0 Hz, 1H), 2.50 (s, 3H); **<sup>13</sup>C-NMR** (300 MHz, DMSO-d<sup>6</sup>, ppm)  $\delta$  = 159.3 (d,  $J$  = 235.5 Hz), 135.6 (d,  $J$  = 12.7 Hz), 126.7, 123.9 (q,  $J$  = 289.5 Hz), 122.6, 120.1 (d,  $J$  = 10.1 Hz), 108.8 (d,  $J$  = 24.3 Hz), 105.2, 98.2 (d,  $J$  = 25.5 Hz), 76.4 ( t,  $J$  = 30.2 Hz); **<sup>19</sup>F-NMR** (475 MHz, DMSO-d<sup>6</sup>, ppm)  $\delta$  = -75.89 (s, 6F); **GC-MS(EI) m/z:** Calcd. for C<sub>12</sub>H<sub>9</sub>F<sub>6</sub>NO = 315.0, found 315.0

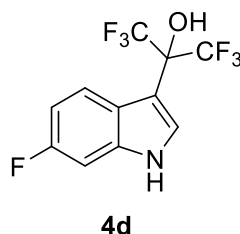

**1,1,1,3,3,3-hexafluoro-2-(6-fluoro-1H-indol-3-yl)propan-2-ol, known compound, 4d<sup>3</sup>,** light brown solid (35 % yield). **<sup>1</sup>H-NMR** (300MHz, DMSO-d<sup>6</sup>, ppm)  $\delta$  = 11.63 (s, 1H) ,8.42(s, 1H), 7.80-7.71(m, 1H), 7.54 (d,  $J$  = 2.51 Hz, 1H), 7.23 (dd,  $J$  = 2.42 Hz,  $J$  = 7.44 Hz, 1H), 6.95 (dt,  $J$  = 2.47 Hz,  $J$  = 9.33 Hz, 1H). **<sup>13</sup>C-NMR** (300 MHz, DMSO-d<sup>6</sup>, ppm)  $\delta$  = 159.3 (d,  $J$  = 235.5 Hz), 135.6 (d,  $J$  = 12.7 Hz), 126.7, 123.9(q,  $J$  = 289.5 Hz), 122.6, 120.1 (d,  $J$  = 10.1 Hz), 108.8 (d,  $J$  = 24.3 Hz), 105.2, 98.2 (d,  $J$  = 25.5 Hz), 76.4 ( t,  $J$  = 30.2 Hz). **<sup>19</sup>F-NMR** (475 MHz, DMSO-d<sup>6</sup>, ppm)  $\delta$  = -75.3 (s, 6F), -124.0 (m, 1F); **GC-MS(EI) m/z:** Calcd. for C<sub>12</sub>H<sub>9</sub>F<sub>6</sub>NO = 301.0, found 301.1



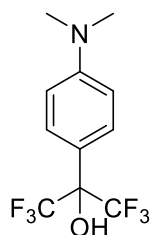

**4e**

**2-(4-(dimethylamino)phenyl)-1,1,1,3,3,3-hexafluoropropan-2-ol, known compound, 4e<sup>4</sup>**, white solid (30 % yield). **<sup>1</sup>H-NMR** (300MHz, DMSO-d<sup>6</sup>, ppm)  $\delta$  = 8.30 (s, 1H), 7.42 (d,  $J$  = 8.81 Hz, 2H), 6.81-6.74 (m, 2H), 2.93(s, 6H). **<sup>13</sup>C-NMR** (300 MHz, DMSO-d<sup>6</sup>, ppm)  $\delta$  = 150.5, 150.5, 128.0, 125.1, 122.3, 117.2, 113.7; **<sup>19</sup>F-NMR** (475 MHz, DMSO-d<sup>6</sup>, ppm)  $\delta$  = -74.3 (s, 6F); **GC-MS(EI)** m/z: Calcd. for C<sub>12</sub>H<sub>9</sub>F<sub>6</sub>NO = 287.1, found 287.1

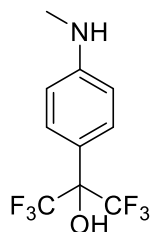

**4f**

**1,1,1,3,3,3-hexafluoro-2-(4-(methylamino)phenyl)propan-2-ol, 4f<sup>4</sup>**, white solid (26 % yield). **<sup>1</sup>H-NMR** (300 MHz, DMSO-d<sup>6</sup>)  $\delta$  = 8.17 (s, 1H), 7.28(d,  $J$  = 8.46 Hz, 2H), 6.65-6.57 (m, 2H), 5.42(s, 2H); **<sup>13</sup>C-NMR** (300MHz, DMSO-d<sup>6</sup>, ppm)  $\delta$  = 150.5, 150.5, 128.0, 125.1, 122.3, 117.2, 113.7; **<sup>19</sup>F-NMR** (475 MHz, DMSO-d<sup>6</sup>, ppm)  $\delta$  = -74.36 (s, 6F); **GC-MS(EI)** m/z: Calcd. for C<sub>12</sub>H<sub>9</sub>F<sub>6</sub>NO = 273.0, found 273.0

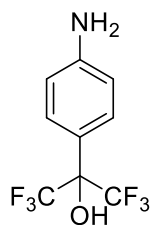

**4g**

**2-(4-aminophenyl)-1,1,1,3,3,3-hexafluoropropan-2-ol, known compound, 4g<sup>4</sup>**, white solid (20 % yield). **<sup>1</sup>H-NMR** (300 MHz, DMSO-d<sup>6</sup>, ppm<sup>6</sup>)  $\delta$  = 8.17 (s, 1H), 7.28 (d,  $J$  = 8.46 Hz, 2H), 6.65-6.57 (m, 2H), 5.42 (s, 2H); **<sup>13</sup>C-NMR** (300 MHz,

DMSO-d<sup>6</sup>, ppm)  $\delta$  = 150.5, 150.5, 128.0, 125.1, 122.3, 117.2, 113.7; <sup>19</sup>F-NMR (475 MHz, DMSO-d<sup>6</sup>, ppm)  $\delta$  = -74.36 (s, 6F); **GC-MS(EI)** m/z: Calcd. for C<sub>12</sub>H<sub>9</sub>F<sub>6</sub>NO = 259.0, found 259.0

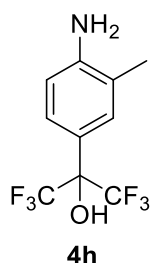

**2-(4-amino-3-methylphenyl)-1,1,1,3,3,3-hexafluoro-2-propan-2-ol, known compound, 4g<sup>4</sup>**, white solid (38 % yield). <sup>1</sup>H-NMR (300 MHz, DMSO-d<sup>6</sup>)  $\delta$  = 8.15 (s, 1H), 7.23-7.10 (m, 2H), 6.64 (d,  $J$  = 8.35 Hz, 1H), 5.19 (s, 2H), 2.07 (s, 3H); <sup>13</sup>C-NMR (300 MHz, DMSO-d<sup>6</sup>, ppm)  $\delta$  = 148.5, 128.7, 125.5, 125.2, 122.3, 120.9, 117.5, 113.7, 18.1; <sup>19</sup>F-NMR (475 MHz, DMSO-d<sup>6</sup>, ppm)  $\delta$  = -74.28 (s, 6F); **GC-MS(EI)** m/z: Calcd. for C<sub>12</sub>H<sub>9</sub>F<sub>6</sub>NO = 273.0, found 273.0.

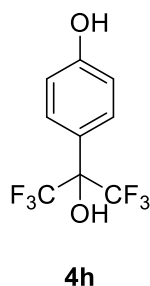

**4-(1,1,1,3,3,3-hexafluoro-2-hydroxypropan-2-yl)phenol, known compound, 4h**, <sup>1</sup>H-NMR (300MHz, DMSO-d<sup>6</sup>, ppm)  $\delta$  = 9.87 (s, 1H), 8.43 (s, 1H), 7.47(d,  $J$  = 8.61 Hz, 1H), 6.90-6.82 (m, 2H); **GC-MS(EI)** m/z: Calcd. for C<sub>12</sub>H<sub>9</sub>F<sub>6</sub>NO = 260.0, found 260.0.

## Reference

1. Wang, G.; Yu, N.; Wen, Y.; Leng, F., Direct fluoroacylation of indole with perfluoroalkyl iodides. *Org. Lett.* **2023**, *25*, 5548-5551.
2. Chen, J.; Li, M.; Zhang, J.; Sun, W.; Jiang, Y., Copper-catalyzed functionalization of aza-aromatic rings with fluoroalcohols via direct C(sp<sup>2</sup>)-H/C(sp<sup>3</sup>)-H coupling reactions. *Org. Lett.* **2020**, *22*,

3033-3038.

3. Qin, H.; Zhang, Z.; Qiao, K.; Chen, X.; He, W.; Liu, C.; Yang, X.; Yang, Z.; Fang, Z.; Guo, K., Regioselective C3-fluoroalcoholation of indoles with heptafluoroisopropyl iodide via palladium-catalyzed C(sp<sup>2</sup>)-C(sp<sup>3</sup>) cross-coupling in the presence of O<sub>2</sub>. *J. Org. Chem.* **2022**, *87*, 9128-9138.
4. Zhao, H.; Zhao, S.; Li, X.; Deng, Y.; Jiang, H.; Zhang, M., Cobalt-catalyzed selective functionalization of aniline derivatives with hexafluoroisopropanol. *Org. Lett.* **2019**, *21*, 218-222.

# Copies of NMR spectra

## $^1\text{H-NMR}$ ( $\text{d}_6\text{-DMSO}$ , 300MHz) of 3a

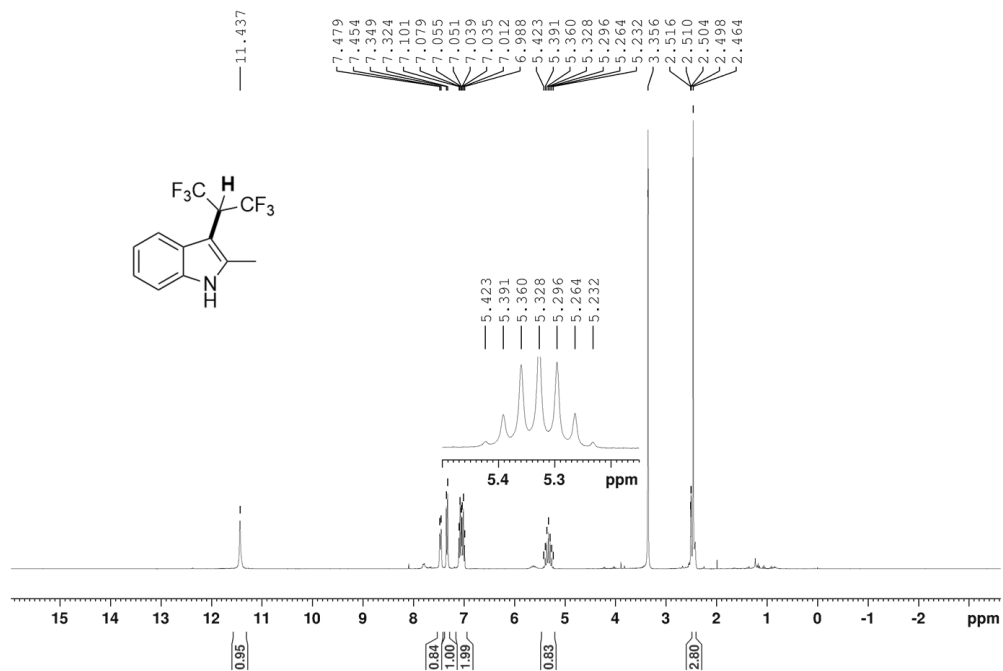

## $^{13}\text{C-NMR}$ ( $\text{d}_6\text{-DMSO}$ , 75MHz) of 3a

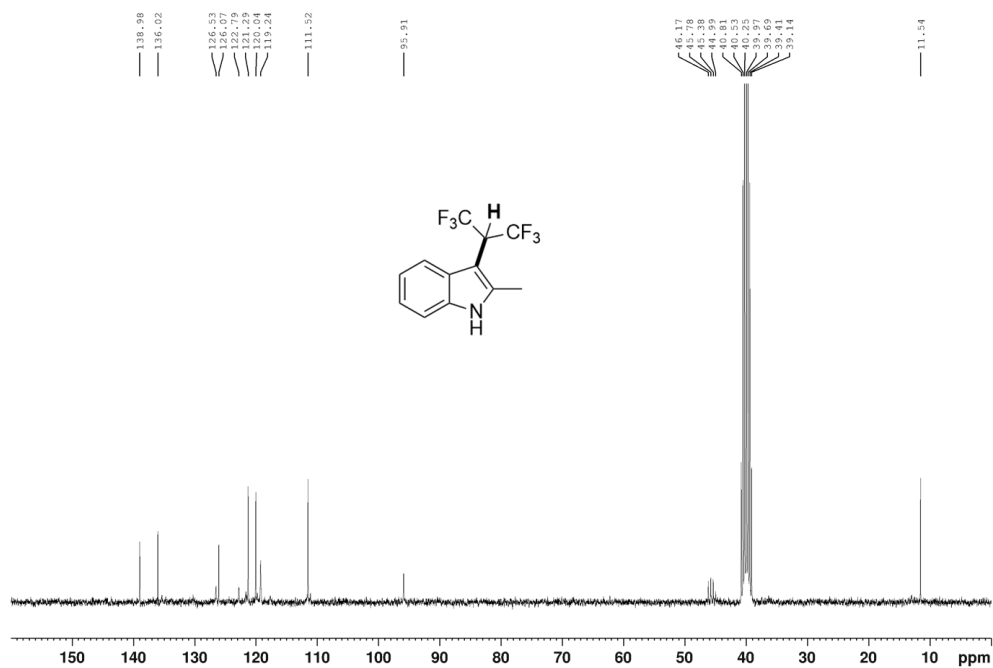

**<sup>19</sup>F-NMR(d<sub>6</sub>-DMSO, 470MHz) of 3a**

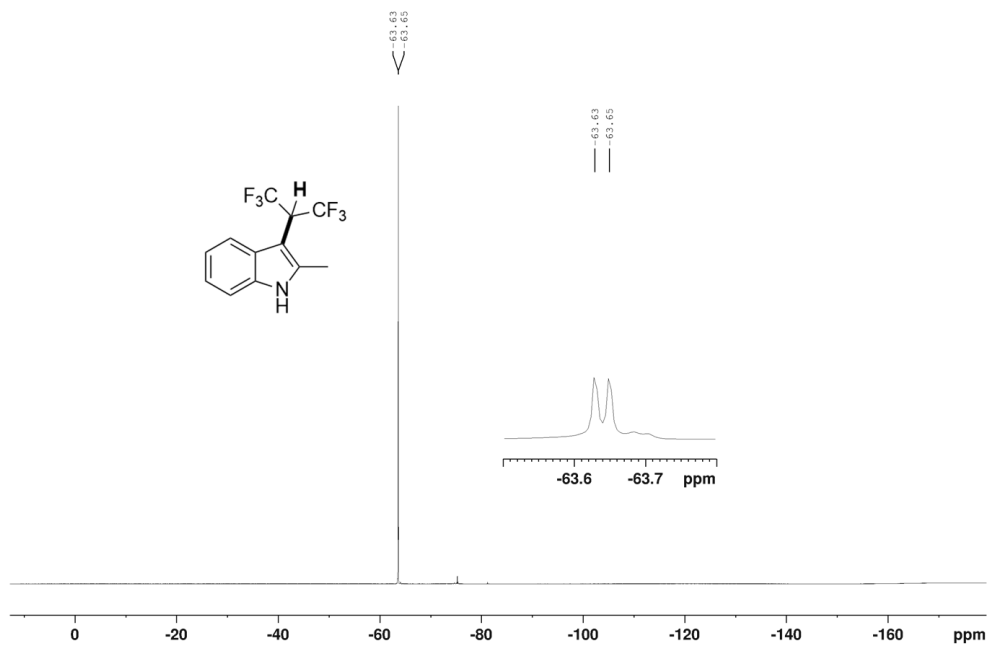

**<sup>1</sup>H-NMR(d<sub>6</sub>-DMSO, 500MHz) of 3a'**

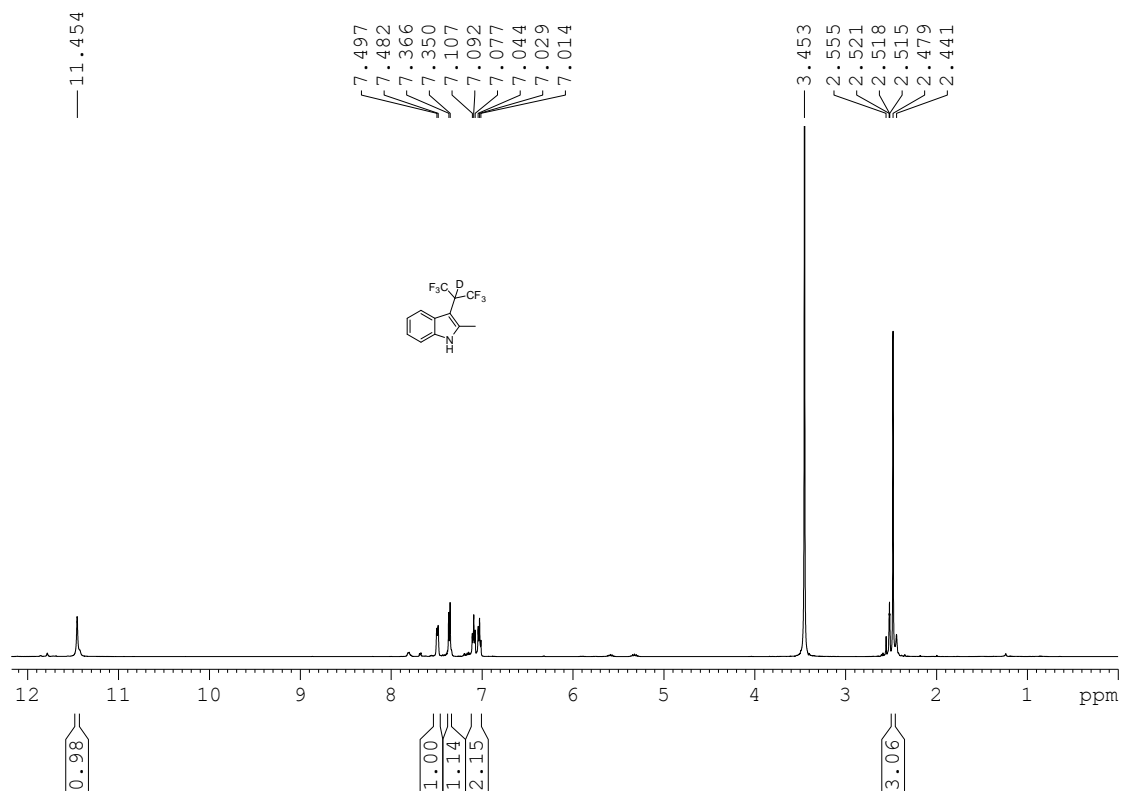

**<sup>13</sup>C-NMR(d<sub>6</sub>-DMSO, 500MHz) of 3a'**

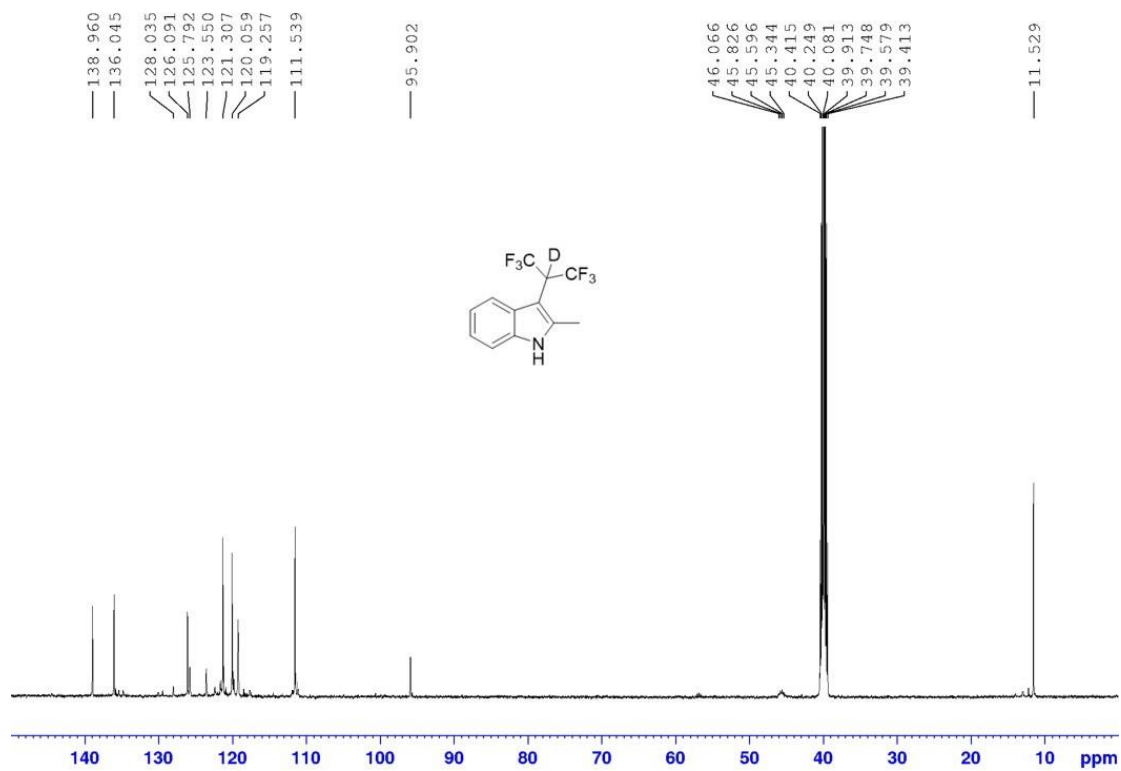

**<sup>19</sup>F-NMR(d<sub>6</sub>-DMSO, 500MHz) of 3a'**

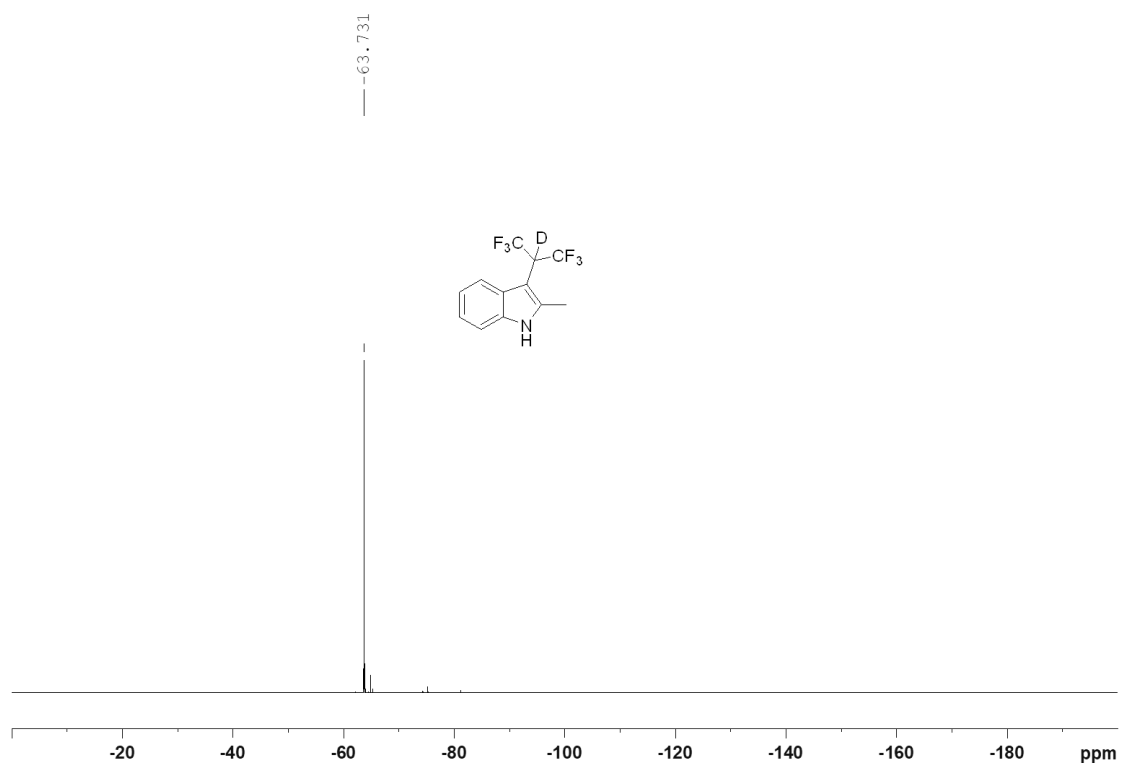

**$^1\text{H-NMR}$ ( $\text{CDCl}_3$ , 300MHz) of 3b**

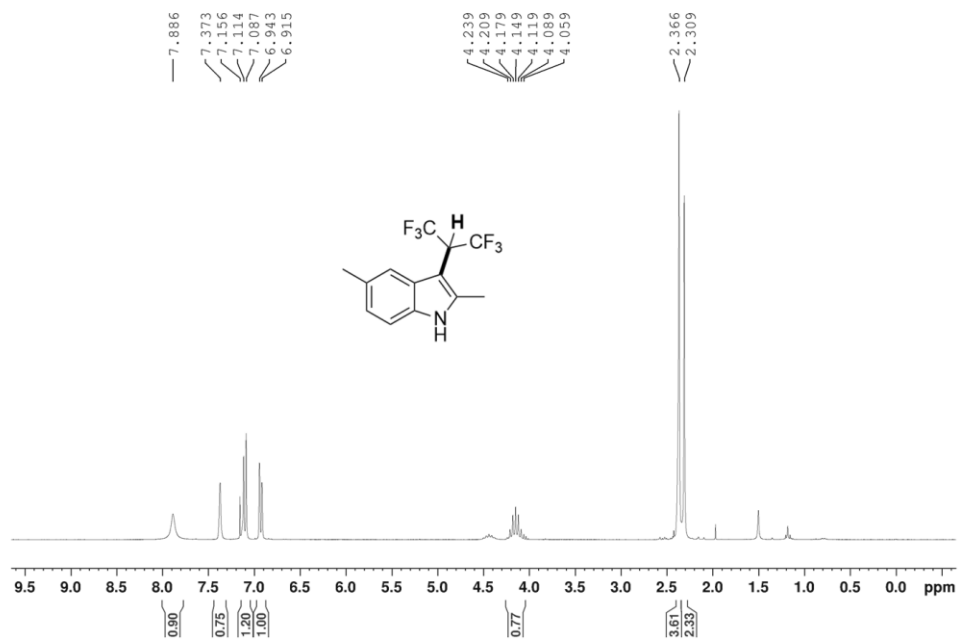

**$^{13}\text{C-NMR}$ ( $\text{CDCl}_3$ , 75MHz) of 3b**

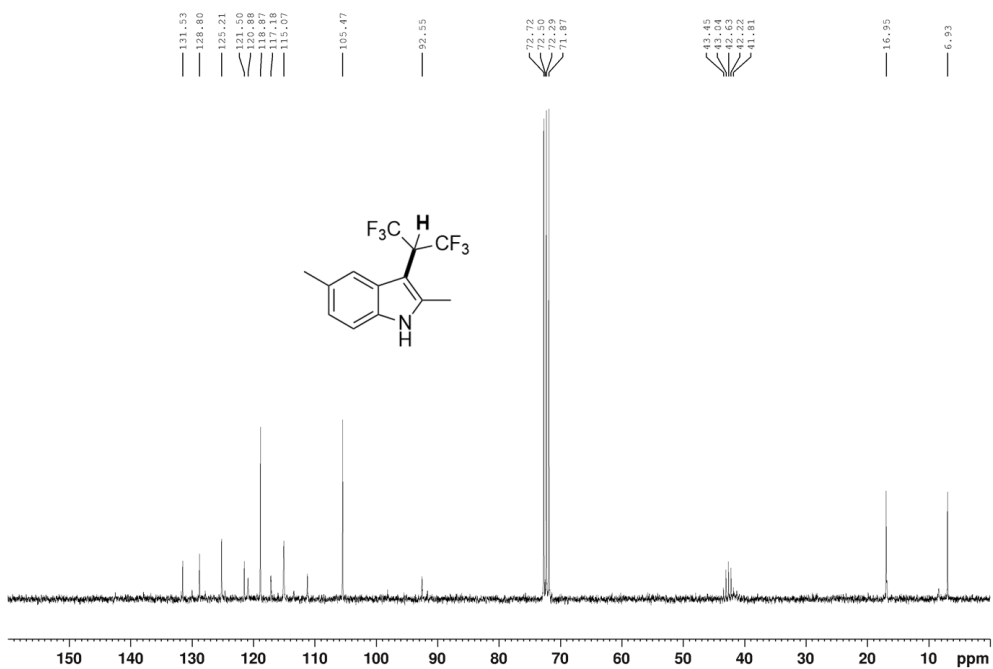

**<sup>19</sup>F-NMR(d<sub>6</sub>-DMSO, 470MHz) of 3b**

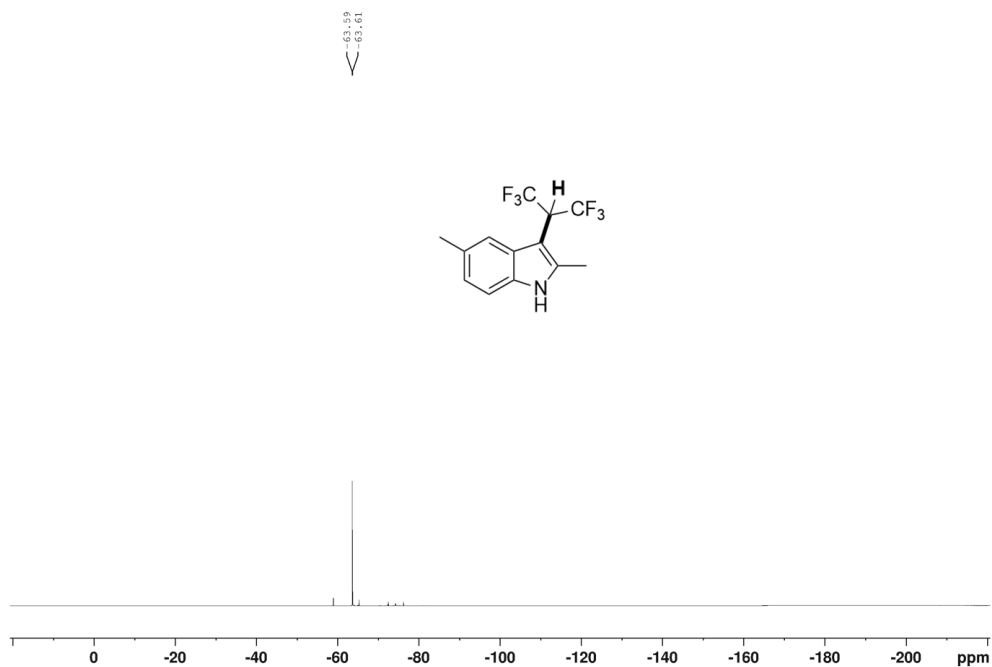

**<sup>1</sup>H-NMR(d<sub>6</sub>-DMSO, 300MHz) of 3c**

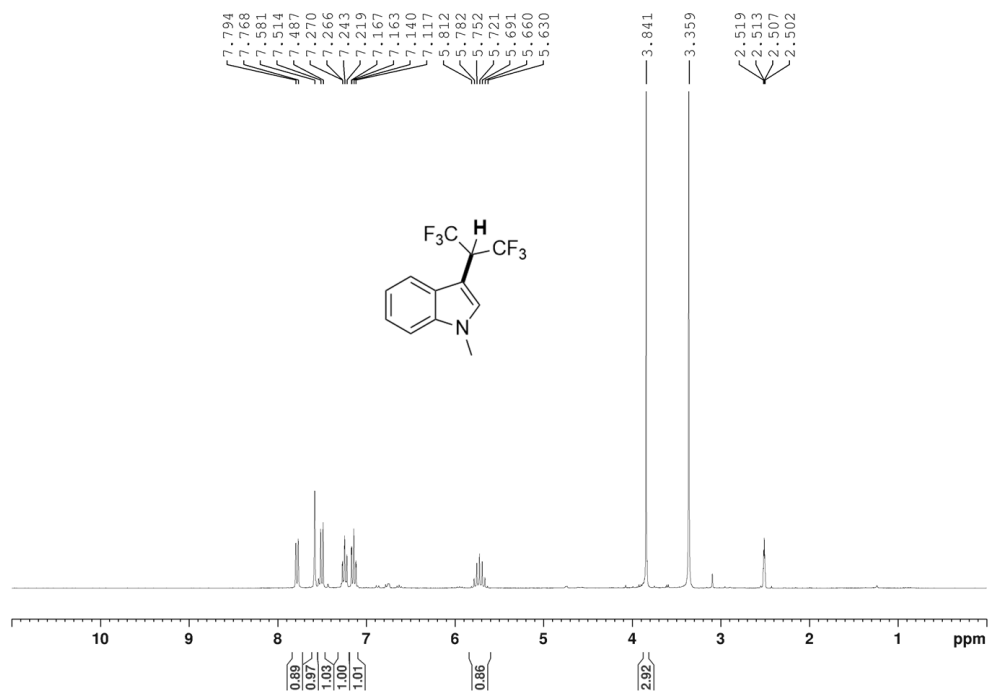



**$^{13}\text{C}$ -NMR( $d_6$ -DMSO, 75MHz) of 3c**

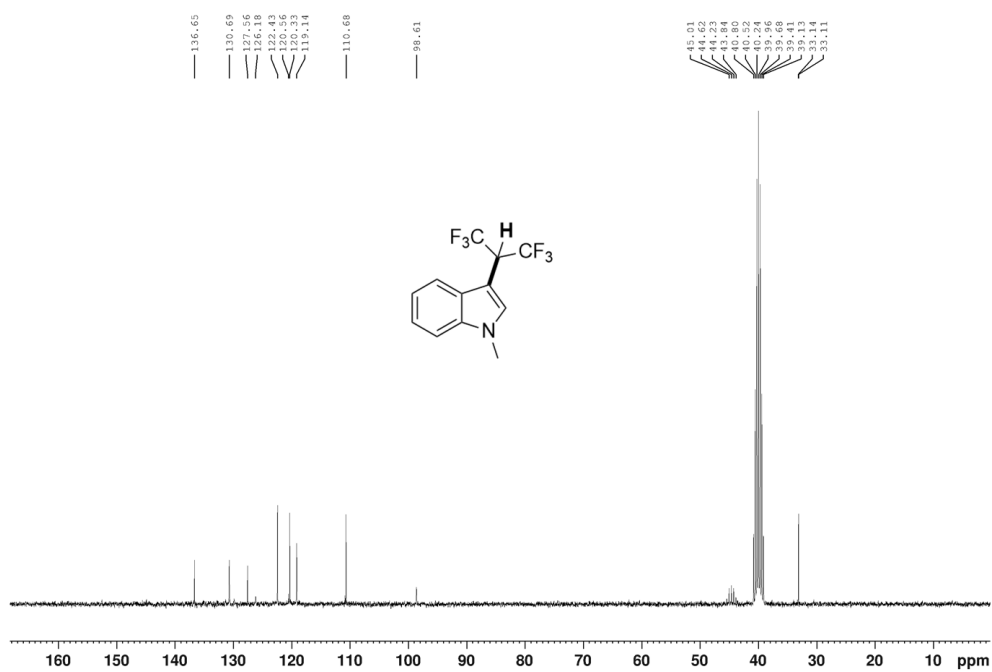

**$^{19}\text{F}$ -NMR( $d_6$ -DMSO, 470MHz) of 3c**

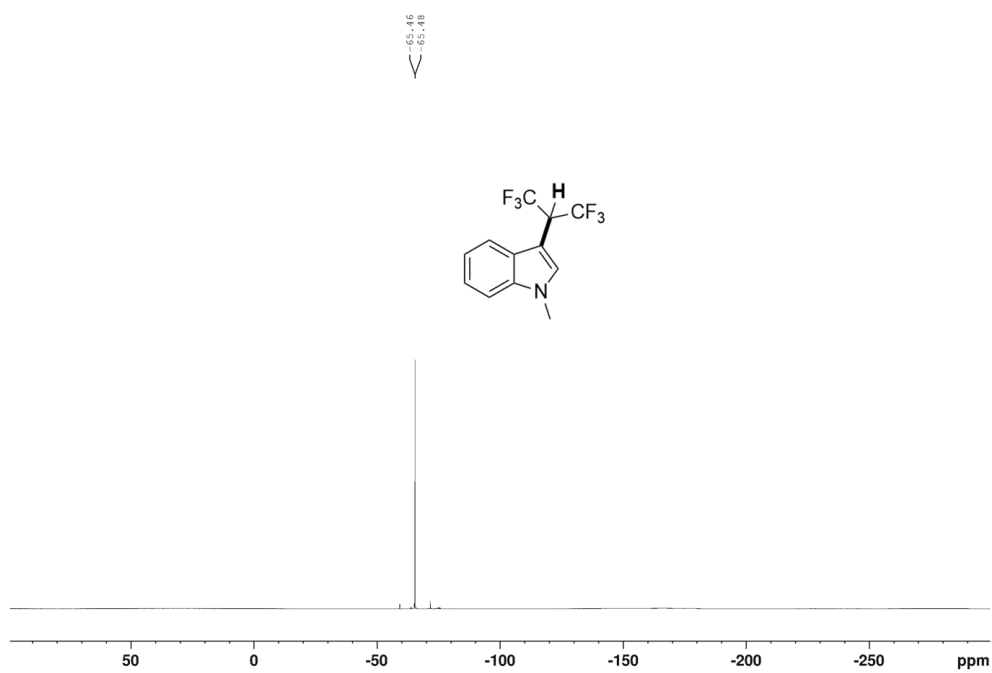

**<sup>1</sup>H-NMR(d<sub>6</sub>-DMSO, 300MHz) of 3d**

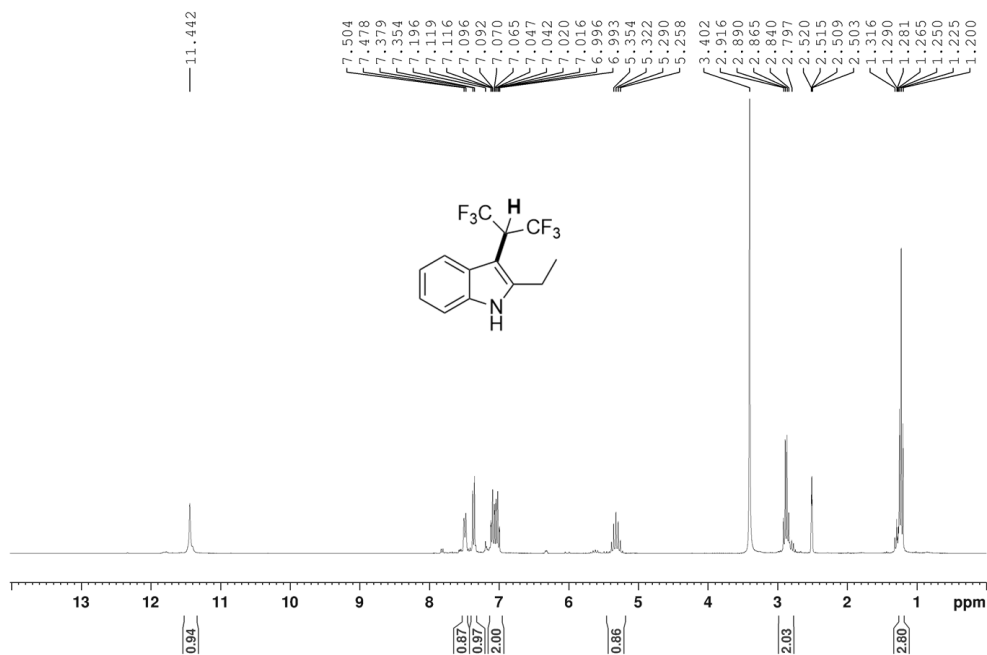

**<sup>13</sup>C-NMR(d<sub>6</sub>-DMSO, 75MHz) of 3d**

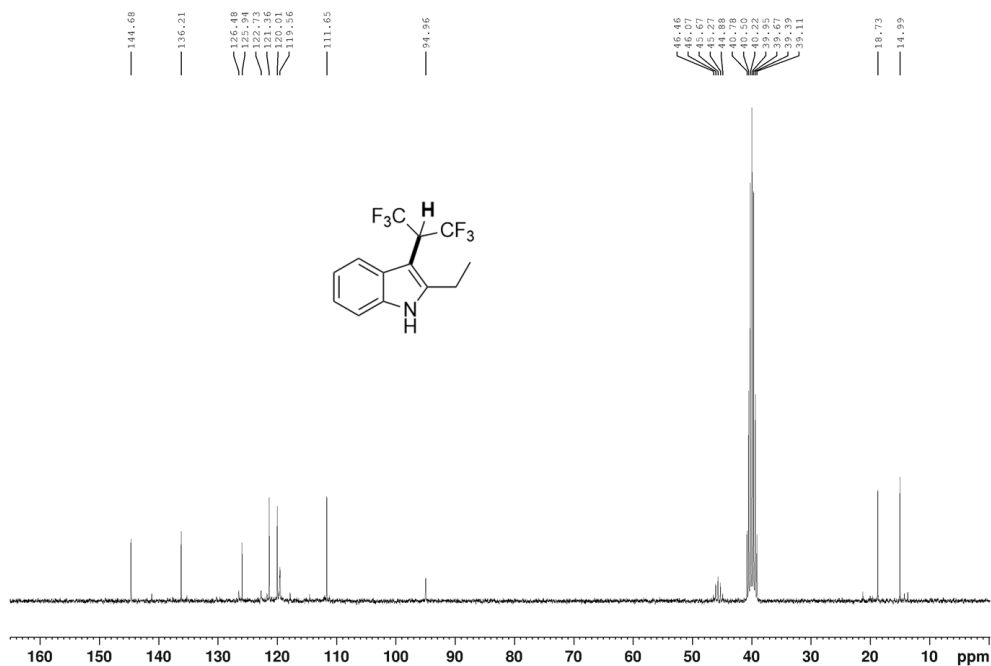

<sup>19</sup>F-NMR(d<sub>6</sub>-DMSO, 470MHz) of 3d

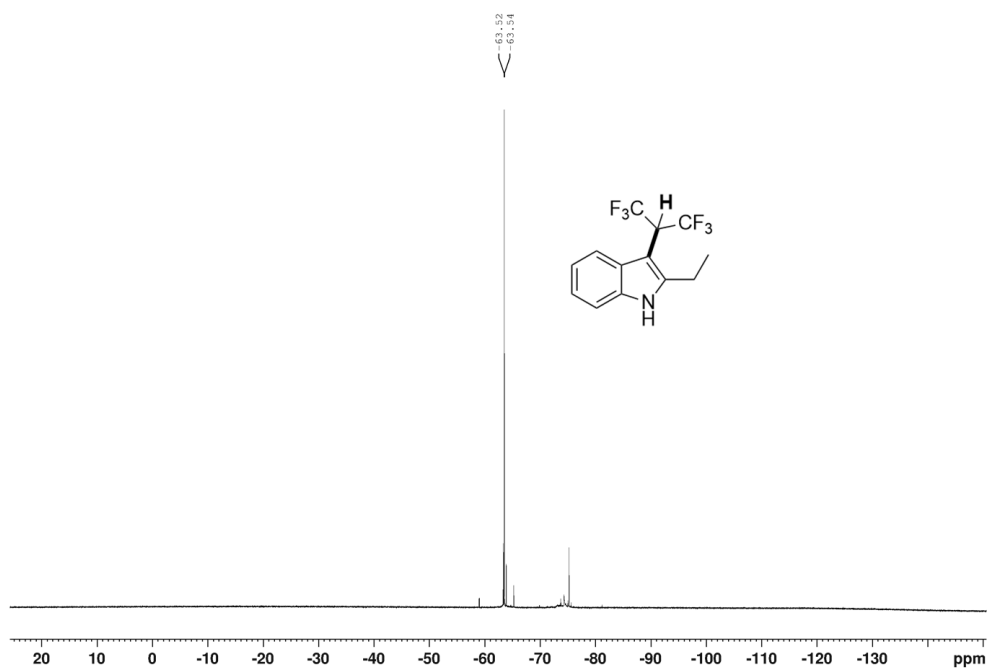

<sup>1</sup>H-NMR(d<sub>6</sub>-DMSO, 300MHz) of 3e

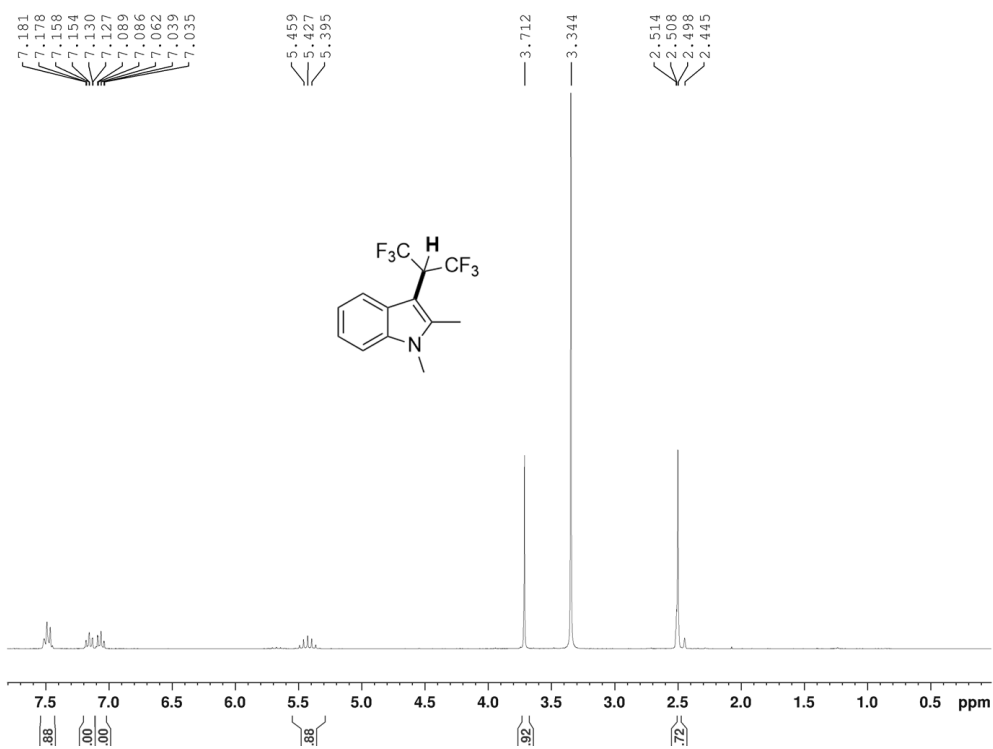

**<sup>13</sup>C-NMR(d<sub>6</sub>-DMSO, 75MHz) of 3e**

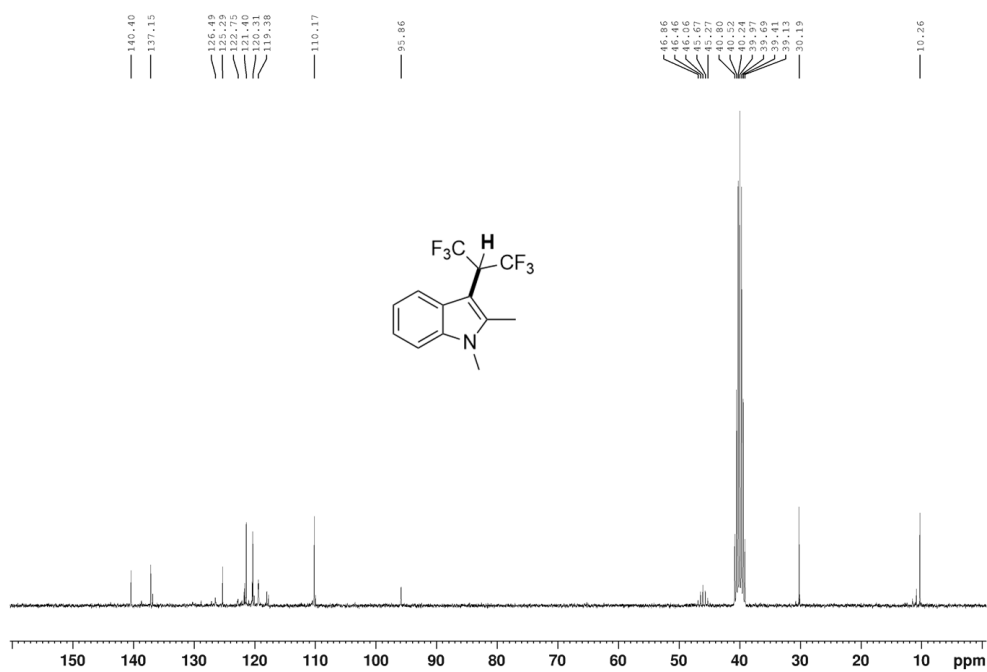

**<sup>19</sup>F-NMR(d<sub>6</sub>-DMSO, 470MHz) of 3e**

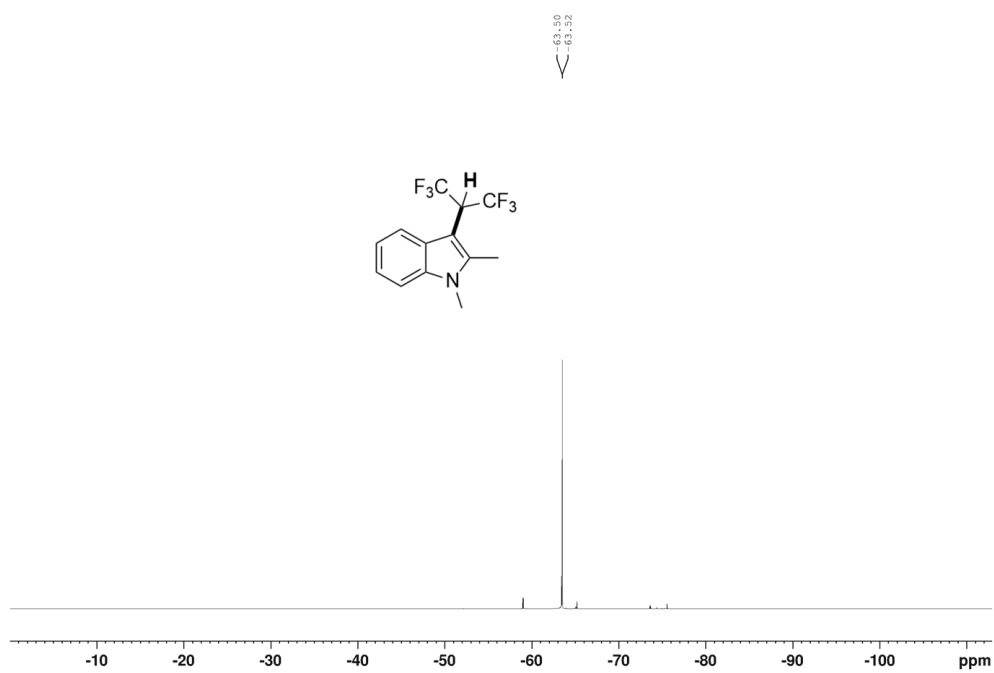

**$^1\text{H-NMR}(\text{d}_6\text{-DMSO}, 300\text{MHz})$  of **3f****

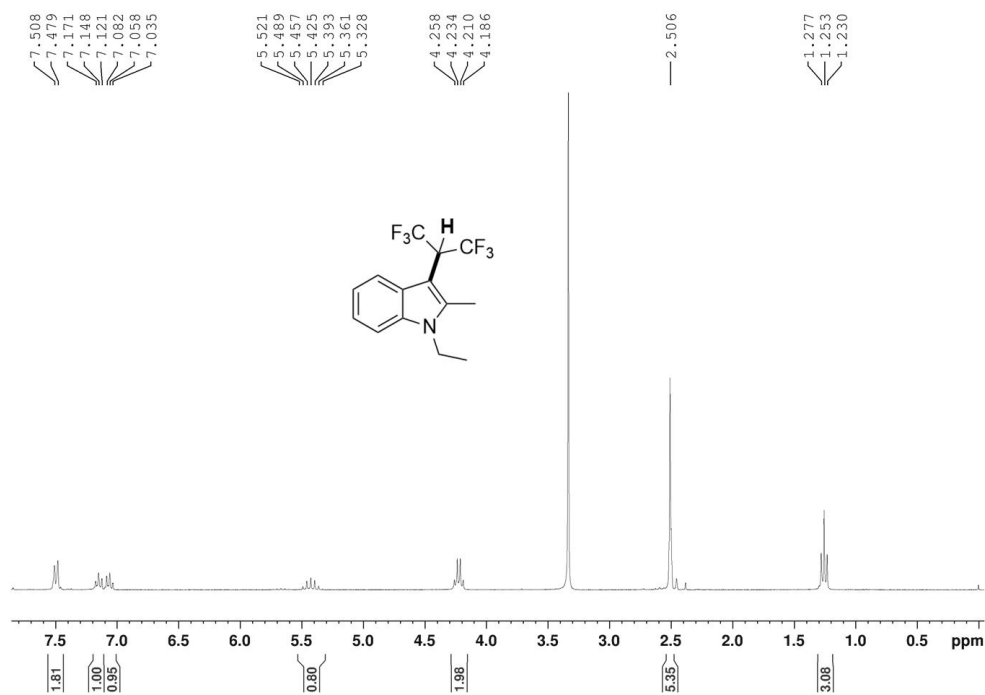

**$^{13}\text{C-NMR}(\text{d}_6\text{-DMSO}, 75\text{MHz})$  of **3f****

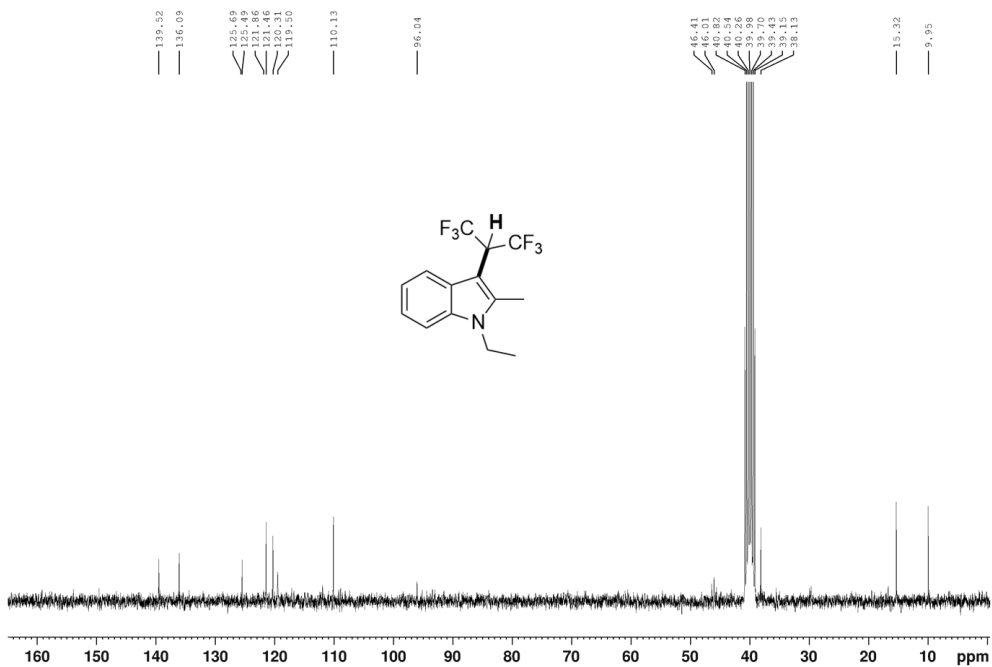

<sup>19</sup>F-NMR(d<sub>6</sub>-DMSO, 470MHz) of 3f

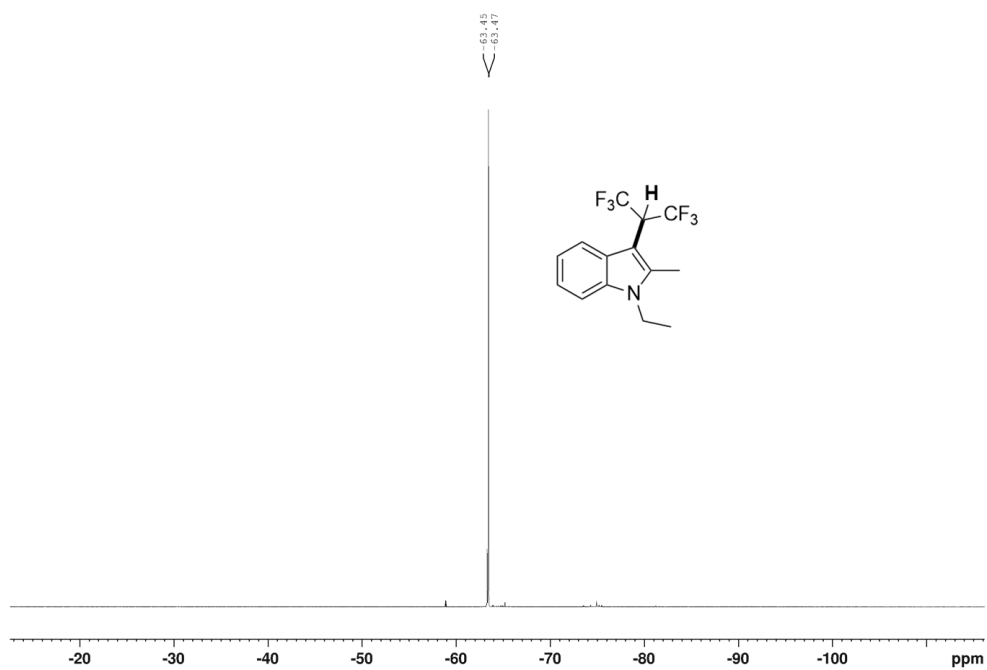

<sup>1</sup>H-NMR(d<sub>6</sub>-DMSO, 300MHz) of 3g

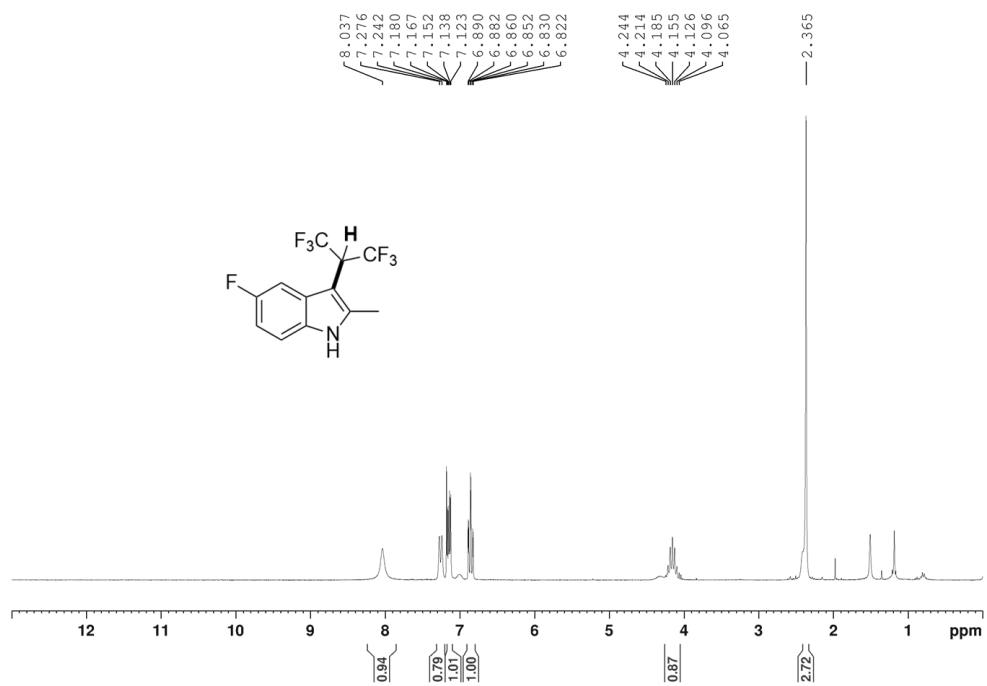

**<sup>13</sup>C-NMR(d<sub>6</sub>-DMSO, 75MHz) of 3g**

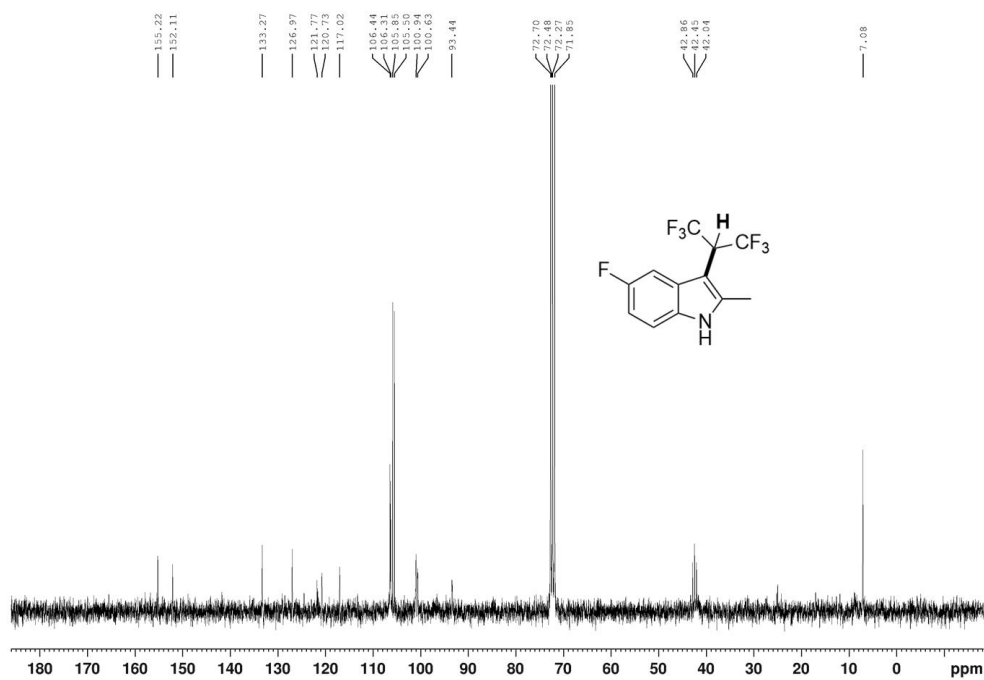

**<sup>19</sup>F-NMR(d<sub>6</sub>-DMSO, 470MHz) of 3g**

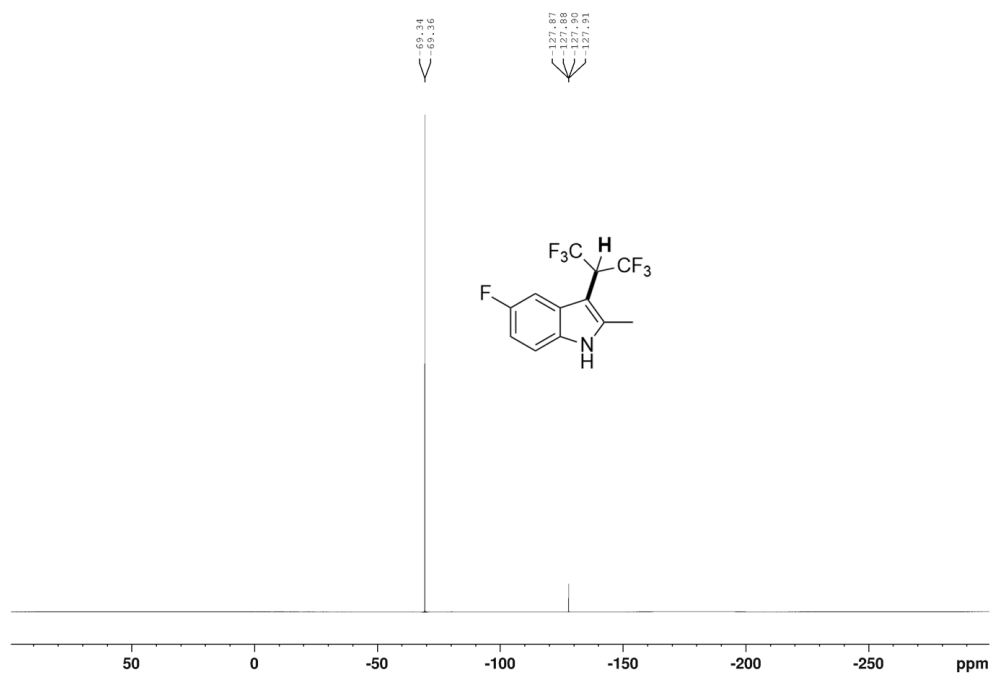

**<sup>1</sup>H-NMR(d<sub>6</sub>-DMSO, 300MHz) of 3h**

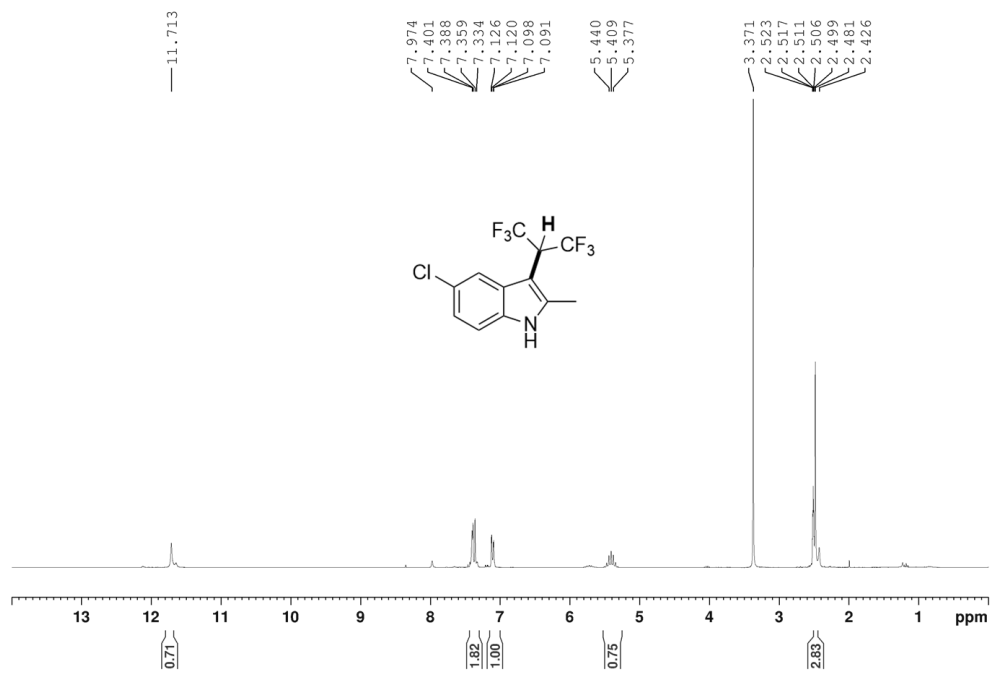

**<sup>13</sup>C-NMR(d<sub>6</sub>-DMSO, 75MHz) of 3h**

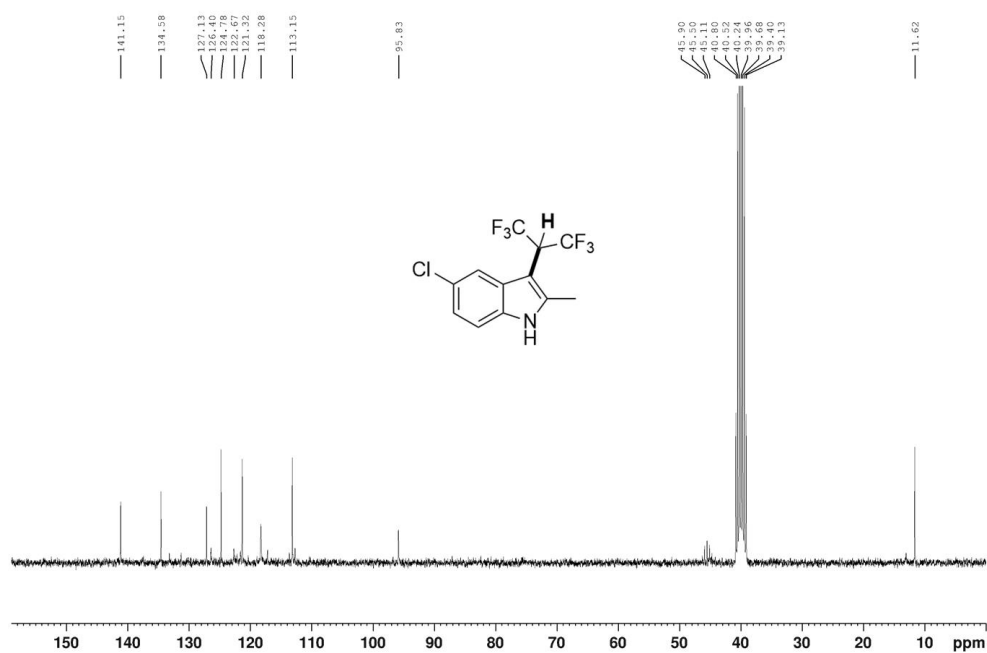



**$^{19}\text{F}$ -NMR( $\text{d}_6$ -DMSO, 470MHz) of 3h**

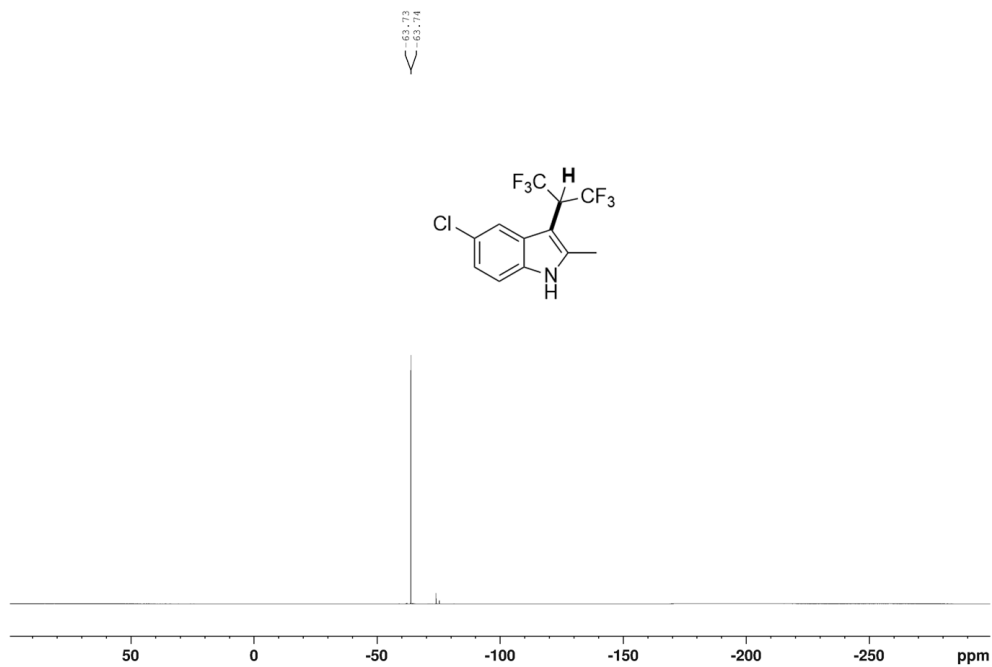

**$^1\text{H}$ -NMR( $\text{d}_6$ -DMSO, 300MHz) of 3i**

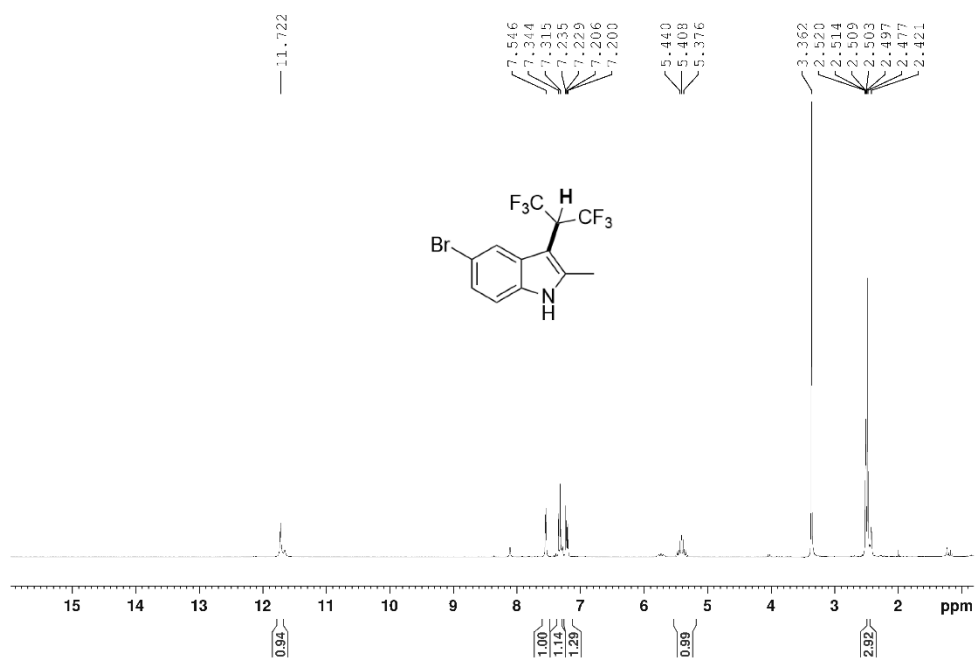

**$^{13}\text{C}$ -NMR( $\text{d}_6$ -DMSO, 75MHz) of 3i**

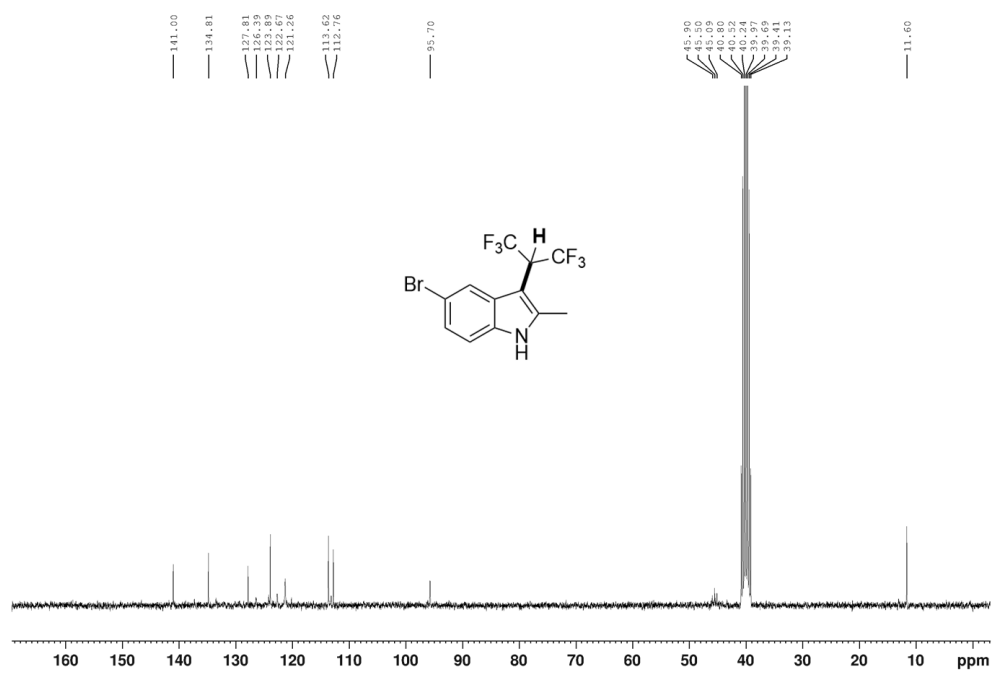

**$^{19}\text{F}$ -NMR( $\text{d}_6$ -DMSO, 470MHz) of 3i**

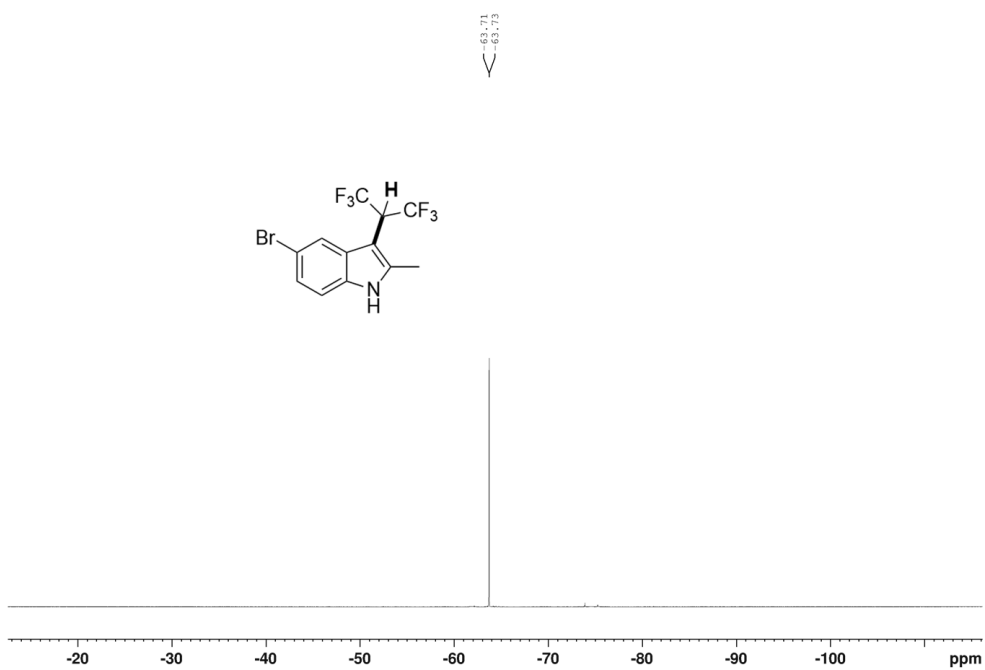



<sup>19</sup>F-NMR(d<sub>6</sub>-DMSO, 470MHz) of 3j

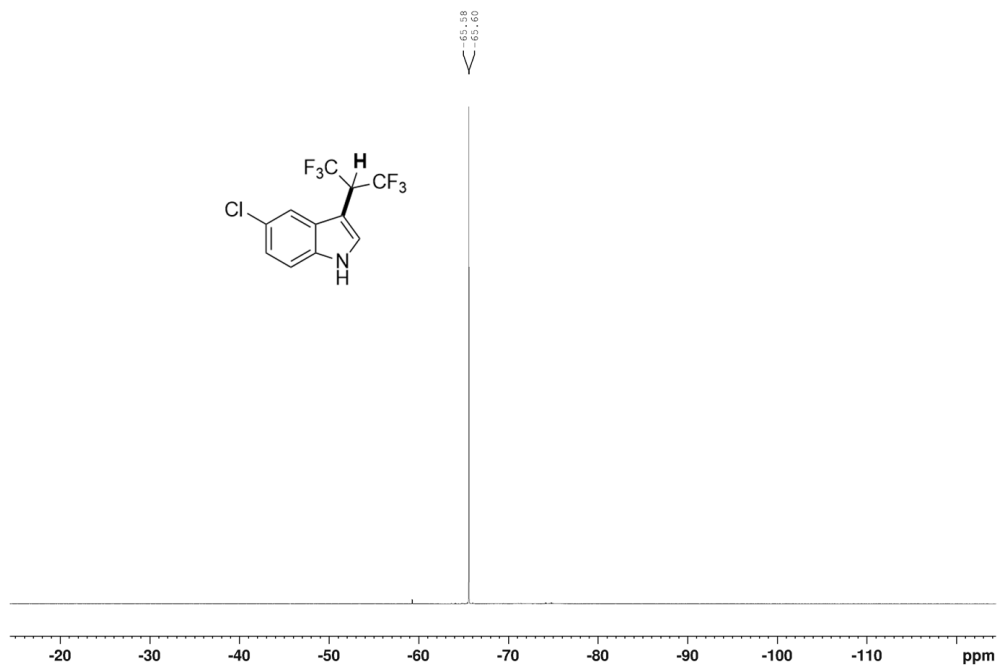

<sup>1</sup>H-NMR(d<sub>6</sub>-DMSO, 300MHz) of 3k

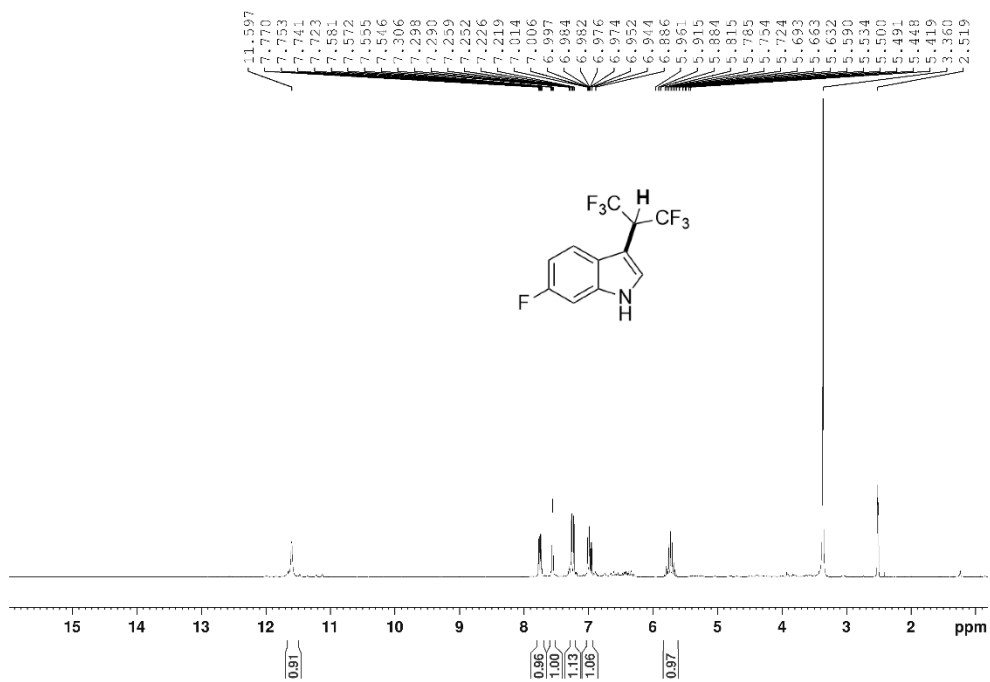

**<sup>13</sup>C-NMR(d<sub>6</sub>-DMSO, 75MHz) of 3k**

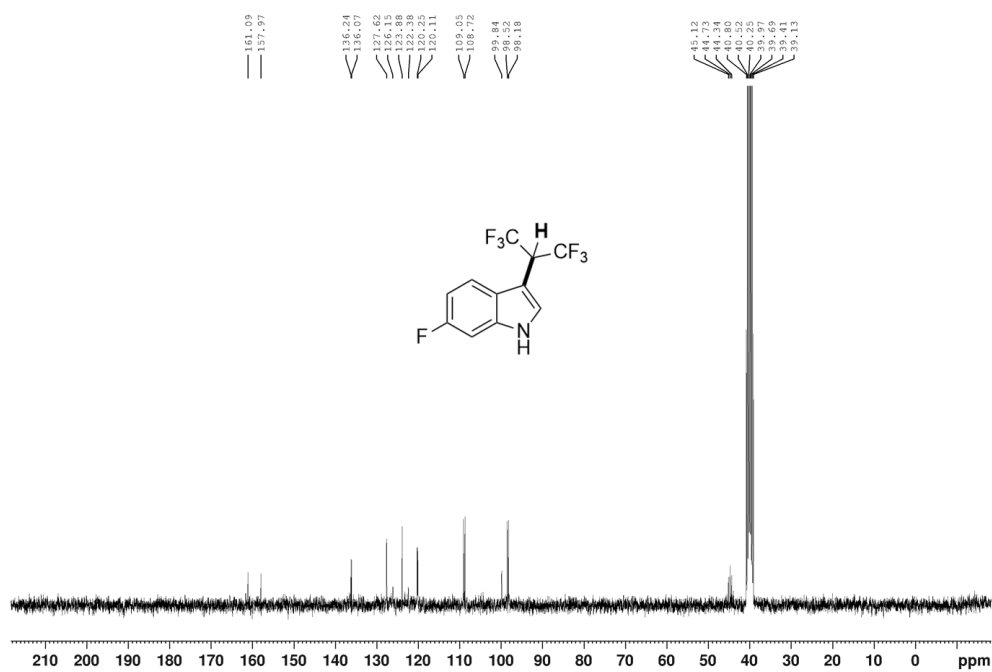

**<sup>19</sup>F-NMR(d<sub>6</sub>-DMSO, 470MHz) of 3k**

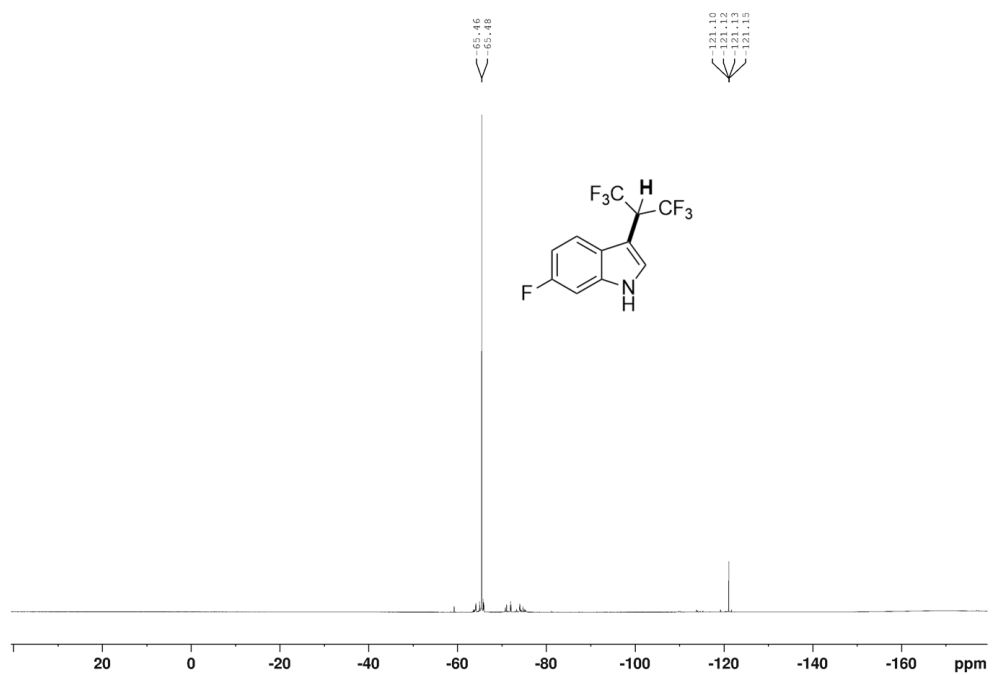

Supplement: d5qo00024f1.pdf [file d5qo00024f1.pdf]
